# Supplementary material for: Human landscape disturbance and wildlife gut microbiota: global knowledge gaps
Source: PeerJ. 2026 Jan 12;14:e20545. doi: 10.7717/peerj.20545 (PMC12805913; doi:10.7717/peerj.20545)
Supplement: Supplemental Information 1 — Data from columns 6, 7, and 8 correspond to attributes of the host species evaluated in the studies [file peerj-14-20545-s001.xlsx]

## Sheet: Hoja1
Supplementary Material.
Table S1: Studies selected for data extraction (n = 119): Data from columns 6, 7, and 8 correspond to attributes of the host species evaluated in the studies
Number	Authors	Year	Title	Number species	Order	Species	IUCN Conservation status	Regions	Country	Type population	sample	fresness of stools	N sample	16S rRNA region	Sequencing method/technology	Use of landscape metrics (Y/N)	Type of landscape metric	Qualitative metrics	Quantitative metrics	The study relate landscape metrics to human disturbance?	The study include human disturbancelandscape in the analyses? (Y/N)	Significant differences in alpha diversity due to habitat (Y/N)	Alpha diversity index	DOI
1	Amato et al.,	2013	Habitat degradation impacts black howler monkey (Alouatta pigra) gastrointestinal microbiomes	1	Primate	Alouatta pigra	EN	North America	Mexico	wild/captive	stools	fresh	128	16S V1–V3	Pyrosequenced 454 FLX-Titanium	Y	qualitative	Habitat types	NA	Explicit	Y	Y	Shannon, Simpson, Chao1, Observed OTUs	https://doi.org/10.1038/ismej.2013.16
2	Li et al.,	2013	Diet diversity is associated with beta but not alpha diversity of pika gut microbiota	1	Lagomorpha	Ochotona curzoniae	LC	Asia	China	wild	corpse	NA	24	16S	Metabarcoding Illumina Miseq	N	NA	NA	NA	NA	NA	N	Shannon, Observed OTUs	https://doi.org/10.3389/fmicb.2016.01169
3	Stothart et al.,	2019	It's what's on the inside that counts: stress physiology underlies variation in the microbiome of a wild urban mammal	1	Rodentia	Sciurus carolinensis	LC	North America	Canada	wild	stools	fresh	29	16S V3-V4	Metabarcoding Illumina MiSeq	Y	qualitative	Habitat types	NA	Explicit	Y	N	NA	https://doi.org/10.1098/rspb.2019.2111
4	Pacheco-Sandoval et al.,	2014	The Pacific harbor seal gut microbiota in Mexico: Its relationship with diet and functional inferences	1	Carnivora	Phoca vitulina richardii	LC	North America	Mexico	wild	stools	fresh	20	16S V4	Metabarcoding Illumina	N	NA	NA	NA	NA	NA	Y	Shannon, PD, Observed OTUs	https://doi.org/10.1371/journal.pone.0221770
5	Barelli et al.,	2015	Habitat fragmentation is associated to gut microbiota diversity of an endangered primate: implications for conservation	1	Primate	Procolobus gordonorum	VU	Africa	Tanzania	wild	stools	fresh	31	16S V1–V3	Pyrosequenced GS 454 FLX+ DNA Sequencer	Y	qualitative	Habitat types	NA	Explicit	Y	Y	Shannon, Chao1, Observed OTUs	https://doi.org/10.1038/srep14862
6	Zhao et al.,	2018	Characterization of the gut microbiota in six geographical populations of Chinese rhesus macaques (Macaca mulatta), implying an adaptation to high-altitude environment	1	Primate	Macaca mulatta	LC	Asia	China	wild	stools	fresh	36	16S V4-V5	Metarbarcoding illumina Miseq	N	NA	NA	NA	NA	NA	Y	Shannon, Simpson, Chao1,Observed OTUs	https://doi.org/10.1007/s00248-018-1146-8
7	Wolf et al.,	2021	Gut microbiome composition predicts summer core range size in a generalist and specialist ungulate	2	Artiodactyla	Oreamnos americanus	LC	North America	Canada	wild	stools	fresh	48	16S V3-V4	Metabarcoding Illumina Miseq	Y	quantitative	NA	Core range size, Escape terrain proportion use, Treed proportion use, Heat Load Index average	Not explicit	Y	Y	Observed ASVs, Pielou’s evenness	https://doi.org/10.1093/femsec/fiab048
7	Wolf et al.,	2021	Gut microbiome composition predicts summer core range size in a generalist and specialist ungulate	2	Artiodactyla	Odocoileus virginianus	LC	North America	Canada	wild	stools	fresh	48	16S V3-V4	Metabarcoding Illumina Miseq	Y	quantitative	NA	Core range size, Escape terrain proportion use, Treed proportion use, Heat Load Index average	Not explicit	Y	Y	Observed ASVs, Pielou’s evenness	https://doi.org/10.1093/femsec/fiab048
8	Weinstein et al.,	2021	Microbiome stability and structure is governed by host phylogeny over diet and geography in woodrats (Neotoma spp.)	7	Rodentia	Neotoma albigula	LC	North America	EEUU	wild	stools	fresh	300	16S V4	Metabarcoding Miniseq	N	NA	NA	NA	NA	NA	Y	Shannon, Observed ASVs	https://doi.org/10.1073/pnas.2108787118
8	Weinstein et al.,	2021	Microbiome stability and structure is governed by host phylogeny over diet and geography in woodrats (Neotoma spp.)	7	Rodentia	Neotoma bryanti	LC	North America	EEUU	wild	stools	fresh	300	16S V4	Metabarcoding Miniseq	N	NA	NA	NA	NA	NA	Y	Shannon, Observed ASVs	https://doi.org/10.1073/pnas.2108787118
8	Weinstein et al.,	2021	Microbiome stability and structure is governed by host phylogeny over diet and geography in woodrats (Neotoma spp.)	7	Rodentia	Neotoma cinerea	LC	North America	EEUU	wild	stools	fresh	300	16S V4	Metabarcoding Miniseq	N	NA	NA	NA	NA	NA	Y	Shannon, Observed ASVs	https://doi.org/10.1073/pnas.2108787118
8	Weinstein et al.,	2021	Microbiome stability and structure is governed by host phylogeny over diet and geography in woodrats (Neotoma spp.)	7	Rodentia	Neotoma devia	LC	North America	EEUU	wild	stools	fresh	300	16S V4	Metabarcoding Miniseq	N	NA	NA	NA	NA	NA	Y	Shannon, Observed ASVs	https://doi.org/10.1073/pnas.2108787118
8	Weinstein et al.,	2021	Microbiome stability and structure is governed by host phylogeny over diet and geography in woodrats (Neotoma spp.)	7	Rodentia	Neotoma lepida	LC	North America	EEUU	wild	stools	fresh	300	16S V4	Metabarcoding Miniseq	N	NA	NA	NA	NA	NA	Y	Shannon, Observed ASVs	https://doi.org/10.1073/pnas.2108787118
8	Weinstein et al.,	2021	Microbiome stability and structure is governed by host phylogeny over diet and geography in woodrats (Neotoma spp.)	7	Rodentia	Neotoma macrotis	LC	North America	EEUU	wild	stools	fresh	300	16S V4	Metabarcoding Miniseq	N	NA	NA	NA	NA	NA	Y	Shannon, Observed ASVs	https://doi.org/10.1073/pnas.2108787118
8	Weinstein et al.,	2021	Microbiome stability and structure is governed by host phylogeny over diet and geography in woodrats (Neotoma spp.)	7	Rodentia	Neotoma stephensi	LC	North America	EEUU	wild	stools	fresh	300	16S V4	Metabarcoding Miniseq	N	NA	NA	NA	NA	NA	Y	Shannon, Observed ASVs	https://doi.org/10.1073/pnas.2108787118
9	Phillips et al.,	2018	The effects of landscape urbanization on the gut microbiome: an exploration into the gut of urban and rural white-crowned sparrows	1	Passeriformes	Zonotrichia leucophrys	LC	North America	EEUU	wild	rectal swab	NA	77	16S V4	Metabarcoding Illumina Miseq	Y	qualitative/quantitative	Habitat types	% plant cover, urban/rural, % regional impervious, % tree, % shrub, % grass	Explicit	Y	Y	Shannon	https://doi.org/10.3389/fevo.2018.00148
10	Bennett et al.,	2016	Host age, social group, and habitat type influence the gut microbiota of wild ring-tailed lemurs (Lemur catta)	1	Primate	Lemur catta	EN	Africa	Madagascar	wild	stools	fresh	45	16S V4	Metabarcoding Illumina Miseq	Y	qualitative	Habitat types	NA	Explicit	Y	N	Chao1	https://doi.org/10.1002/ajp.22555
11	Amato et al.,	2016	Phylogenetic and ecological factors impact the gut microbiota of two Neotropical primate species	2	Primate	Alouatta pigra	EN	North America	Mexico-Costa Rica	wild	stools	NA	91	16S V4	Metabarcoding Illumina Miseq	Y	qualitative	Habitat types	NA	Explicit	Y	Y	Chao1	https://doi.org/10.1007/s00442-015-3507-z
11	Amato et al.,	2016	Phylogenetic and ecological factors impact the gut microbiota of two Neotropical primate species	2	Primate	Alouatta palliata	VU	North America	Mexico-Costa Rica	wild	stools	NA	91	16S V4	Metabarcoding Illumina Miseq	Y	qualitative	Habitat types	NA	Explicit	Y	Y	Chao1	https://doi.org/10.1007/s00442-015-3507-z
12	Kropáčková et al.,	2016	Codiversification of gastrointestinal microbiota and phylogeny in passerines is not explained by ecological divergence	51	Passeriformes	Acrocephalus arundinaceus	LC	Europe	Czech Republic	wild	stools	fresh	319	16S V3-V4	Metabarcoding Illumina Miseq	N	NA	NA	NA	NA	NA	N	Chao1	https://doi.org/10.1111/mec.14144
12	Kropáčková et al.,	2016	Codiversification of gastrointestinal microbiota and phylogeny in passerines is not explained by ecological divergence	51	Passeriformes	Acrocephalus scirpaceus	LC	Europe	Czech Republic	wild	stools	fresh	319	16S V3-V4	Metabarcoding Illumina Miseq	N	NA	NA	NA	NA	NA	N	Chao1	https://doi.org/10.1111/mec.14144
12	Kropáčková et al.,	2016	Codiversification of gastrointestinal microbiota and phylogeny in passerines is not explained by ecological divergence	51	Passeriformes	Acrocephalus palustris	LC	Europe	Czech Republic	wild	stools	fresh	319	16S V3-V4	Metabarcoding Illumina Miseq	N	NA	NA	NA	NA	NA	N	Chao1	https://doi.org/10.1111/mec.14144
12	Kropáčková et al.,	2016	Codiversification of gastrointestinal microbiota and phylogeny in passerines is not explained by ecological divergence	51	Passeriformes	Acrocephalus schoenobaenus	LC	Europe	Czech Republic	wild	stools	fresh	319	16S V3-V4	Metabarcoding Illumina Miseq	N	NA	NA	NA	NA	NA	N	Chao1	https://doi.org/10.1111/mec.14144
12	Kropáčková et al.,	2016	Codiversification of gastrointestinal microbiota and phylogeny in passerines is not explained by ecological divergence	51	Passeriformes	Aegithalos caudatus	LC	Europe	Czech Republic	wild	stools	fresh	319	16S V3-V4	Metabarcoding Illumina Miseq	N	NA	NA	NA	NA	NA	N	Chao1	https://doi.org/10.1111/mec.14144
12	Kropáčková et al.,	2016	Codiversification of gastrointestinal microbiota and phylogeny in passerines is not explained by ecological divergence	51	Passeriformes	Carduelis carduelis	LC	Europe	Czech Republic	wild	stools	fresh	319	16S V3-V4	Metabarcoding Illumina Miseq	N	NA	NA	NA	NA	NA	N	Chao1	https://doi.org/10.1111/mec.14144
12	Kropáčková et al.,	2016	Codiversification of gastrointestinal microbiota and phylogeny in passerines is not explained by ecological divergence	51	Passeriformes	Carduelis flammea	LC	Europe	Czech Republic	wild	stools	fresh	319	16S V3-V4	Metabarcoding Illumina Miseq	N	NA	NA	NA	NA	NA	N	Chao1	https://doi.org/10.1111/mec.14144
12	Kropáčková et al.,	2016	Codiversification of gastrointestinal microbiota and phylogeny in passerines is not explained by ecological divergence	51	Passeriformes	Carduelis chloris	LC	Europe	Czech Republic	wild	stools	fresh	319	16S V3-V4	Metabarcoding Illumina Miseq	N	NA	NA	NA	NA	NA	N	Chao1	https://doi.org/10.1111/mec.14144
12	Kropáčková et al.,	2016	Codiversification of gastrointestinal microbiota and phylogeny in passerines is not explained by ecological divergence	51	Passeriformes	Carpodacus erythrinus	LC	Europe	Czech Republic	wild	stools	fresh	319	16S V3-V4	Metabarcoding Illumina Miseq	N	NA	NA	NA	NA	NA	N	Chao1	https://doi.org/10.1111/mec.14144
12	Kropáčková et al.,	2016	Codiversification of gastrointestinal microbiota and phylogeny in passerines is not explained by ecological divergence	51	Passeriformes	Certhia familiaris	LC	Europe	Czech Republic	wild	stools	fresh	319	16S V3-V4	Metabarcoding Illumina Miseq	N	NA	NA	NA	NA	NA	N	Chao1	https://doi.org/10.1111/mec.14144
12	Kropáčková et al.,	2016	Codiversification of gastrointestinal microbiota and phylogeny in passerines is not explained by ecological divergence	51	Passeriformes	Cinclus cinclus	LC	Europe	Czech Republic	wild	stools	fresh	319	16S V3-V4	Metabarcoding Illumina Miseq	N	NA	NA	NA	NA	NA	N	Chao1	https://doi.org/10.1111/mec.14144
12	Kropáčková et al.,	2016	Codiversification of gastrointestinal microbiota and phylogeny in passerines is not explained by ecological divergence	51	Passeriformes	Coccothraustes coccothraustes	LC	Europe	Czech Republic	wild	stools	fresh	319	16S V3-V4	Metabarcoding Illumina Miseq	N	NA	NA	NA	NA	NA	N	Chao1	https://doi.org/10.1111/mec.14144
12	Kropáčková et al.,	2016	Codiversification of gastrointestinal microbiota and phylogeny in passerines is not explained by ecological divergence	51	Passeriformes	Cyanistes caeruleus	LC	Europe	Czech Republic	wild	stools	fresh	319	16S V3-V4	Metabarcoding Illumina Miseq	N	NA	NA	NA	NA	NA	N	Chao1	https://doi.org/10.1111/mec.14144
12	Kropáčková et al.,	2016	Codiversification of gastrointestinal microbiota and phylogeny in passerines is not explained by ecological divergence	51	Passeriformes	Delichon urbicum	LC	Europe	Czech Republic	wild	stools	fresh	319	16S V3-V4	Metabarcoding Illumina Miseq	N	NA	NA	NA	NA	NA	N	Chao1	https://doi.org/10.1111/mec.14144
12	Kropáčková et al.,	2016	Codiversification of gastrointestinal microbiota and phylogeny in passerines is not explained by ecological divergence	51	Passeriformes	Emberiza citrinella	LC	Europe	Czech Republic	wild	stools	fresh	319	16S V3-V4	Metabarcoding Illumina Miseq	N	NA	NA	NA	NA	NA	N	Chao1	https://doi.org/10.1111/mec.14144
12	Kropáčková et al.,	2016	Codiversification of gastrointestinal microbiota and phylogeny in passerines is not explained by ecological divergence	51	Passeriformes	Emberiza schoeniclus	LC	Europe	Czech Republic	wild	stools	fresh	319	16S V3-V4	Metabarcoding Illumina Miseq	N	NA	NA	NA	NA	NA	N	Chao1	https://doi.org/10.1111/mec.14144
12	Kropáčková et al.,	2016	Codiversification of gastrointestinal microbiota and phylogeny in passerines is not explained by ecological divergence	51	Passeriformes	Erithacus rubecula	LC	Europe	Czech Republic	wild	stools	fresh	319	16S V3-V4	Metabarcoding Illumina Miseq	N	NA	NA	NA	NA	NA	N	Chao1	https://doi.org/10.1111/mec.14144
12	Kropáčková et al.,	2016	Codiversification of gastrointestinal microbiota and phylogeny in passerines is not explained by ecological divergence	51	Passeriformes	Ficedula albicollis	LC	Europe	Czech Republic	wild	stools	fresh	319	16S V3-V4	Metabarcoding Illumina Miseq	N	NA	NA	NA	NA	NA	N	Chao1	https://doi.org/10.1111/mec.14144
12	Kropáčková et al.,	2016	Codiversification of gastrointestinal microbiota and phylogeny in passerines is not explained by ecological divergence	51	Passeriformes	Fringilla coelebs	LC	Europe	Czech Republic	wild	stools	fresh	319	16S V3-V4	Metabarcoding Illumina Miseq	N	NA	NA	NA	NA	NA	N	Chao1	https://doi.org/10.1111/mec.14144
12	Kropáčková et al.,	2016	Codiversification of gastrointestinal microbiota and phylogeny in passerines is not explained by ecological divergence	51	Passeriformes	Hippolais icterina	LC	Europe	Czech Republic	wild	stools	fresh	319	16S V3-V4	Metabarcoding Illumina Miseq	N	NA	NA	NA	NA	NA	N	Chao1	https://doi.org/10.1111/mec.14144
12	Kropáčková et al.,	2016	Codiversification of gastrointestinal microbiota and phylogeny in passerines is not explained by ecological divergence	51	Passeriformes	Hirundo rustica	LC	Europe	Czech Republic	wild	stools	fresh	319	16S V3-V4	Metabarcoding Illumina Miseq	N	NA	NA	NA	NA	NA	N	Chao1	https://doi.org/10.1111/mec.14144
12	Kropáčková et al.,	2016	Codiversification of gastrointestinal microbiota and phylogeny in passerines is not explained by ecological divergence	51	Passeriformes	Lanius collurio	LC	Europe	Czech Republic	wild	stools	fresh	319	16S V3-V4	Metabarcoding Illumina Miseq	N	NA	NA	NA	NA	NA	N	Chao1	https://doi.org/10.1111/mec.14144
12	Kropáčková et al.,	2016	Codiversification of gastrointestinal microbiota and phylogeny in passerines is not explained by ecological divergence	51	Passeriformes	Locustella fluviatilis	LC	Europe	Czech Republic	wild	stools	fresh	319	16S V3-V4	Metabarcoding Illumina Miseq	N	NA	NA	NA	NA	NA	N	Chao1	https://doi.org/10.1111/mec.14144
12	Kropáčková et al.,	2016	Codiversification of gastrointestinal microbiota and phylogeny in passerines is not explained by ecological divergence	51	Passeriformes	Locustella luscinioides	LC	Europe	Czech Republic	wild	stools	fresh	319	16S V3-V4	Metabarcoding Illumina Miseq	N	NA	NA	NA	NA	NA	N	Chao1	https://doi.org/10.1111/mec.14144
12	Kropáčková et al.,	2016	Codiversification of gastrointestinal microbiota and phylogeny in passerines is not explained by ecological divergence	51	Passeriformes	Luscinia megarhynchos	LC	Europe	Czech Republic	wild	stools	fresh	319	16S V3-V4	Metabarcoding Illumina Miseq	N	NA	NA	NA	NA	NA	N	Chao1	https://doi.org/10.1111/mec.14144
12	Kropáčková et al.,	2016	Codiversification of gastrointestinal microbiota and phylogeny in passerines is not explained by ecological divergence	51	Passeriformes	Luscinia svecica	LC	Europe	Czech Republic	wild	stools	fresh	319	16S V3-V4	Metabarcoding Illumina Miseq	N	NA	NA	NA	NA	NA	N	Chao1	https://doi.org/10.1111/mec.14144
12	Kropáčková et al.,	2016	Codiversification of gastrointestinal microbiota and phylogeny in passerines is not explained by ecological divergence	51	Passeriformes	Motacilla cinerea	LC	Europe	Czech Republic	wild	stools	fresh	319	16S V3-V4	Metabarcoding Illumina Miseq	N	NA	NA	NA	NA	NA	N	Chao1	https://doi.org/10.1111/mec.14144
12	Kropáčková et al.,	2016	Codiversification of gastrointestinal microbiota and phylogeny in passerines is not explained by ecological divergence	51	Passeriformes	Motacilla alba	LC	Europe	Czech Republic	wild	stools	fresh	319	16S V3-V4	Metabarcoding Illumina Miseq	N	NA	NA	NA	NA	NA	N	Chao1	https://doi.org/10.1111/mec.14144
12	Kropáčková et al.,	2016	Codiversification of gastrointestinal microbiota and phylogeny in passerines is not explained by ecological divergence	51	Passeriformes	Muscicapa striata	LC	Europe	Czech Republic	wild	stools	fresh	319	16S V3-V4	Metabarcoding Illumina Miseq	N	NA	NA	NA	NA	NA	N	Chao1	https://doi.org/10.1111/mec.14144
12	Kropáčková et al.,	2016	Codiversification of gastrointestinal microbiota and phylogeny in passerines is not explained by ecological divergence	51	Passeriformes	Parus major	LC	Europe	Czech Republic	wild	stools	fresh	319	16S V3-V4	Metabarcoding Illumina Miseq	N	NA	NA	NA	NA	NA	N	Chao1	https://doi.org/10.1111/mec.14144
12	Kropáčková et al.,	2016	Codiversification of gastrointestinal microbiota and phylogeny in passerines is not explained by ecological divergence	51	Passeriformes	Poecile palustris	LC	Europe	Czech Republic	wild	stools	fresh	319	16S V3-V4	Metabarcoding Illumina Miseq	N	NA	NA	NA	NA	NA	N	Chao1	https://doi.org/10.1111/mec.14144
12	Kropáčková et al.,	2016	Codiversification of gastrointestinal microbiota and phylogeny in passerines is not explained by ecological divergence	51	Passeriformes	Passer domesticus	LC	Europe	Czech Republic	wild	stools	fresh	319	16S V3-V4	Metabarcoding Illumina Miseq	N	NA	NA	NA	NA	NA	N	Chao1	https://doi.org/10.1111/mec.14144
12	Kropáčková et al.,	2016	Codiversification of gastrointestinal microbiota and phylogeny in passerines is not explained by ecological divergence	51	Passeriformes	Passer montanus	LC	Europe	Czech Republic	wild	stools	fresh	319	16S V3-V4	Metabarcoding Illumina Miseq	N	NA	NA	NA	NA	NA	N	Chao1	https://doi.org/10.1111/mec.14144
12	Kropáčková et al.,	2016	Codiversification of gastrointestinal microbiota and phylogeny in passerines is not explained by ecological divergence	51	Passeriformes	Periparus ater	LC	Europe	Czech Republic	wild	stools	fresh	319	16S V3-V4	Metabarcoding Illumina Miseq	N	NA	NA	NA	NA	NA	N	Chao1	https://doi.org/10.1111/mec.14144
12	Kropáčková et al.,	2016	Codiversification of gastrointestinal microbiota and phylogeny in passerines is not explained by ecological divergence	51	Passeriformes	Phoenicurus ochruros	LC	Europe	Czech Republic	wild	stools	fresh	319	16S V3-V4	Metabarcoding Illumina Miseq	N	NA	NA	NA	NA	NA	N	Chao1	https://doi.org/10.1111/mec.14144
12	Kropáčková et al.,	2016	Codiversification of gastrointestinal microbiota and phylogeny in passerines is not explained by ecological divergence	51	Passeriformes	Phoenicurus phoenicurus	LC	Europe	Czech Republic	wild	stools	fresh	319	16S V3-V4	Metabarcoding Illumina Miseq	N	NA	NA	NA	NA	NA	N	Chao1	https://doi.org/10.1111/mec.14144
12	Kropáčková et al.,	2016	Codiversification of gastrointestinal microbiota and phylogeny in passerines is not explained by ecological divergence	51	Passeriformes	Phylloscopus collybita	LC	Europe	Czech Republic	wild	stools	fresh	319	16S V3-V4	Metabarcoding Illumina Miseq	N	NA	NA	NA	NA	NA	N	Chao1	https://doi.org/10.1111/mec.14144
12	Kropáčková et al.,	2016	Codiversification of gastrointestinal microbiota and phylogeny in passerines is not explained by ecological divergence	51	Passeriformes	Phylloscopus trochilus	LC	Europe	Czech Republic	wild	stools	fresh	319	16S V3-V4	Metabarcoding Illumina Miseq	N	NA	NA	NA	NA	NA	N	Chao1	https://doi.org/10.1111/mec.14144
12	Kropáčková et al.,	2016	Codiversification of gastrointestinal microbiota and phylogeny in passerines is not explained by ecological divergence	51	Passeriformes	Prunella modularis	LC	Europe	Czech Republic	wild	stools	fresh	319	16S V3-V4	Metabarcoding Illumina Miseq	N	NA	NA	NA	NA	NA	N	Chao1	https://doi.org/10.1111/mec.14144
12	Kropáčková et al.,	2016	Codiversification of gastrointestinal microbiota and phylogeny in passerines is not explained by ecological divergence	51	Passeriformes	Regulus ignicapilla	LC	Europe	Czech Republic	wild	stools	fresh	319	16S V3-V4	Metabarcoding Illumina Miseq	N	NA	NA	NA	NA	NA	N	Chao1	https://doi.org/10.1111/mec.14144
12	Kropáčková et al.,	2016	Codiversification of gastrointestinal microbiota and phylogeny in passerines is not explained by ecological divergence	51	Passeriformes	Regulus regulus	LC	Europe	Czech Republic	wild	stools	fresh	319	16S V3-V4	Metabarcoding Illumina Miseq	N	NA	NA	NA	NA	NA	N	Chao1	https://doi.org/10.1111/mec.14144
12	Kropáčková et al.,	2016	Codiversification of gastrointestinal microbiota and phylogeny in passerines is not explained by ecological divergence	51	Passeriformes	Remiz pendulinus	LC	Europe	Czech Republic	wild	stools	fresh	319	16S V3-V4	Metabarcoding Illumina Miseq	N	NA	NA	NA	NA	NA	N	Chao1	https://doi.org/10.1111/mec.14144
12	Kropáčková et al.,	2016	Codiversification of gastrointestinal microbiota and phylogeny in passerines is not explained by ecological divergence	51	Passeriformes	Sitta europaea	LC	Europe	Czech Republic	wild	stools	fresh	319	16S V3-V4	Metabarcoding Illumina Miseq	N	NA	NA	NA	NA	NA	N	Chao1	https://doi.org/10.1111/mec.14144
12	Kropáčková et al.,	2016	Codiversification of gastrointestinal microbiota and phylogeny in passerines is not explained by ecological divergence	51	Passeriformes	Sylvia atricapilla	LC	Europe	Czech Republic	wild	stools	fresh	319	16S V3-V4	Metabarcoding Illumina Miseq	N	NA	NA	NA	NA	NA	N	Chao1	https://doi.org/10.1111/mec.14144
12	Kropáčková et al.,	2016	Codiversification of gastrointestinal microbiota and phylogeny in passerines is not explained by ecological divergence	51	Passeriformes	Sylvia borin	LC	Europe	Czech Republic	wild	stools	fresh	319	16S V3-V4	Metabarcoding Illumina Miseq	N	NA	NA	NA	NA	NA	N	Chao1	https://doi.org/10.1111/mec.14144
12	Kropáčková et al.,	2016	Codiversification of gastrointestinal microbiota and phylogeny in passerines is not explained by ecological divergence	51	Passeriformes	Sylvia communis	LC	Europe	Czech Republic	wild	stools	fresh	319	16S V3-V4	Metabarcoding Illumina Miseq	N	NA	NA	NA	NA	NA	N	Chao1	https://doi.org/10.1111/mec.14144
12	Kropáčková et al.,	2016	Codiversification of gastrointestinal microbiota and phylogeny in passerines is not explained by ecological divergence	51	Passeriformes	Sylvia curruca	LC	Europe	Czech Republic	wild	stools	fresh	319	16S V3-V4	Metabarcoding Illumina Miseq	N	NA	NA	NA	NA	NA	N	Chao1	https://doi.org/10.1111/mec.14144
12	Kropáčková et al.,	2016	Codiversification of gastrointestinal microbiota and phylogeny in passerines is not explained by ecological divergence	51	Passeriformes	Troglodytes troglodytes	LC	Europe	Czech Republic	wild	stools	fresh	319	16S V3-V4	Metabarcoding Illumina Miseq	N	NA	NA	NA	NA	NA	N	Chao1	https://doi.org/10.1111/mec.14144
12	Kropáčková et al.,	2016	Codiversification of gastrointestinal microbiota and phylogeny in passerines is not explained by ecological divergence	51	Passeriformes	Turdus merula	LC	Europe	Czech Republic	wild	stools	fresh	319	16S V3-V4	Metabarcoding Illumina Miseq	N	NA	NA	NA	NA	NA	N	Chao1	https://doi.org/10.1111/mec.14144
12	Kropáčková et al.,	2016	Codiversification of gastrointestinal microbiota and phylogeny in passerines is not explained by ecological divergence	51	Passeriformes	Turdus philomelos	LC	Europe	Czech Republic	wild	stools	fresh	319	16S V3-V4	Metabarcoding Illumina Miseq	N	NA	NA	NA	NA	NA	N	Chao1	https://doi.org/10.1111/mec.14144
12	Kropáčková et al.,	2016	Codiversification of gastrointestinal microbiota and phylogeny in passerines is not explained by ecological divergence	51	Passeriformes	Turdus viscivorus	LC	Europe	Czech Republic	wild	stools	fresh	319	16S V3-V4	Metabarcoding Illumina Miseq	N	NA	NA	NA	NA	NA	N	Chao1	https://doi.org/10.1111/mec.14144
13	De Winter et al.,	2020	Effects of seasonality and previous logging on faecal helminth-microbiota associations in wild lemurs	4	Primate	Eulemur rufifrons	VU	Africa	Madagascar	wild	stools	fresh	338	16S V1-V2	Metabarcoding Illumina Miseq	Y	qualitative	Habitat types	NA	Explicit	Y	Y	PD	https://doi.org/10.1038/s41598-020-73827-1
13	De Winter et al.,	2020	Effects of seasonality and previous logging on faecal helminth-microbiota associations in wild lemurs	4	Primate	Eulemur fulvus	VU	Africa	Madagascar	wild	stools	fresh	338	16S V1-V2	Metabarcoding Illumina Miseq	Y	qualitative	Habitat types	NA	Explicit	Y	Y	PD	https://doi.org/10.1038/s41598-020-73827-1
13	De Winter et al.,	2020	Effects of seasonality and previous logging on faecal helminth-microbiota associations in wild lemurs	4	Primate	Eulemur macaco	EN	Africa	Madagascar	wild	stools	fresh	338	16S V1-V2	Metabarcoding Illumina Miseq	Y	qualitative	Habitat types	NA	Explicit	Y	Y	PD	https://doi.org/10.1038/s41598-020-73827-1
13	De Winter et al.,	2020	Effects of seasonality and previous logging on faecal helminth-microbiota associations in wild lemurs	4	Primate	Eulemur rubriventer	VU	Africa	Madagascar	wild	stools	fresh	338	16S V1-V2	Metabarcoding Illumina Miseq	Y	qualitative	Habitat types	NA	Explicit	Y	Y	PD	https://doi.org/10.1038/s41598-020-73827-1
14	Gomez et al.,	2015	Gut microbiome composition and metabolomic profiles of wild western lowland gorillas (Gorilla gorilla gorilla) reflect host ecology	1	Primate	Gorilla gorilla	CR	Africa	Central African Republic	wild	stools	fresh	40	16S V1-V3	Pyrosequenced 454 FLX-Titanium	N	NA	NA	NA	NA	NA	N	Shannon, Chao1	https://doi.org/10.1111/mec.13181
15	Perofsky et al.,	2017	Hierarchical social networks shape gut microbial composition in wild Verreaux's sifaka	1	Primate	Propithecus verreauxi	CR	Africa	Madagascar	wild	stools	fresh	47	16S V4	Metabarcoding Illumina Miseq	Y	qualitative	wild/captive	NA	Explicit	Y	Y	Shannon, Obseved OTUs, Chao1	https://doi.org/10.1098/rspb.2017.2274
16	Aivelo et al.,	2016	Population-and individual-level dynamics of the intestinal microbiota of a small primate	1	Primate	Microcebus rufus	VU	Africa	Madagascar	wild	stools	fresh	160	16S V1-V2	Metabarcoding Illumina Miseq	Y	qualitative	Habitat types	NA	Explicit	Y	Y	Obseved OTUs, Simpson	https://doi.org/10.1128/AEM.00559-16
17	Chang et al.,	2016	Changes of diet and dominant intestinal microbes in farmland frogs	1	Anura	Fejervarya limnocharis	LC	Asia	Taiwan	wild	corpse	NA	40	16S V4	Pyrosequenced 454 FLX-Titanium	Y	qualitative	Habitat types	NA	Explicit	Y	Y	Shannon, Simpson, Chao1, ACE	https://doi.org/10.1186/s12866-016-0660-4
18	Hird et al.,	2015	Comparative gut microbiota of 59 neotropical bird species	59	Apodiformes	Amazilia tzacatl	LC	Central and south america	Costa Rica-Peru	wild	corpse	NA	116	16S V6	Metabarcoding Illumina Hiseq	Y	qualitative	Habitat types	NA	Not explicit	Y	N	Observed OTUs	https://doi.org/10.3389/fmicb.2015.01403
18	Hird et al.,	2016	Comparative gut microbiota of 59 neotropical bird species	59	Apodiformes	Florisuga mellivora	LC	Central and south america	Costa Rica-Peru	wild	corpse	NA	116	16S V6	Metabarcoding Illumina Hiseq	Y	qualitative	Habitat types	NA	Not explicit	Y	N	Observed OTUs	https://doi.org/10.3389/fmicb.2015.01403
18	Hird et al.,	2016	Comparative gut microbiota of 59 neotropical bird species	59	Apodiformes	Phaethornis longirostris	LC	Central and south america	Costa Rica-Peru	wild	corpse	NA	116	16S V6	Metabarcoding Illumina Hiseq	Y	qualitative	Habitat types	NA	Not explicit	Y	N	Observed OTUs	https://doi.org/10.3389/fmicb.2015.01403
18	Hird et al.,	2016	Comparative gut microbiota of 59 neotropical bird species	59	Apodiformes	Thalurania colombica	LC	Central and south america	Costa Rica-Peru	wild	corpse	NA	116	16S V6	Metabarcoding Illumina Hiseq	Y	qualitative	Habitat types	NA	Not explicit	Y	N	Observed OTUs	https://doi.org/10.3389/fmicb.2015.01403
18	Hird et al.,	2016	Comparative gut microbiota of 59 neotropical bird species	59	Apodiformes	Threnetes ruckeri	LC	Central and south america	Costa Rica-Peru	wild	corpse	NA	116	16S V6	Metabarcoding Illumina Hiseq	Y	qualitative	Habitat types	NA	Not explicit	Y	N	Observed OTUs	https://doi.org/10.3389/fmicb.2015.01403
18	Hird et al.,	2016	Comparative gut microbiota of 59 neotropical bird species	59	Caprimulgiformes	Nyctidromus albicollis	LC	Central and south america	Costa Rica-Peru	wild	corpse	NA	116	16S V6	Metabarcoding Illumina Hiseq	Y	qualitative	Habitat types	NA	Not explicit	Y	N	Observed OTUs	https://doi.org/10.3389/fmicb.2015.01403
18	Hird et al.,	2016	Comparative gut microbiota of 59 neotropical bird species	59	Columbiformes	Geotrygon montana	LC	Central and south america	Costa Rica-Peru	wild	corpse	NA	116	16S V6	Metabarcoding Illumina Hiseq	Y	qualitative	Habitat types	NA	Not explicit	Y	N	Observed OTUs	https://doi.org/10.3389/fmicb.2015.01403
18	Hird et al.,	2016	Comparative gut microbiota of 59 neotropical bird species	59	Coraciiformes	Baryphthengus marti	LC	Central and south america	Costa Rica-Peru	wild	corpse	NA	116	16S V6	Metabarcoding Illumina Hiseq	Y	qualitative	Habitat types	NA	Not explicit	Y	N	Observed OTUs	https://doi.org/10.3389/fmicb.2015.01403
18	Hird et al.,	2016	Comparative gut microbiota of 59 neotropical bird species	59	Cuculiformes	Piaya cayana	LC	Central and south america	Costa Rica-Peru	wild	corpse	NA	116	16S V6	Metabarcoding Illumina Hiseq	Y	qualitative	Habitat types	NA	Not explicit	Y	N	Observed OTUs	https://doi.org/10.3389/fmicb.2015.01403
18	Hird et al.,	2016	Comparative gut microbiota of 59 neotropical bird species	59	Passeriformes	Cyanocompsa cyanoides	LC	Central and south america	Costa Rica-Peru	wild	corpse	NA	116	16S V6	Metabarcoding Illumina Hiseq	Y	qualitative	Habitat types	NA	Not explicit	Y	N	Observed OTUs	https://doi.org/10.3389/fmicb.2015.01403
18	Hird et al.,	2016	Comparative gut microbiota of 59 neotropical bird species	59	Passeriformes	Habia atrimaxillaris	NT	Central and south america	Costa Rica-Peru	wild	corpse	NA	116	16S V6	Metabarcoding Illumina Hiseq	Y	qualitative	Habitat types	NA	Not explicit	Y	N	Observed OTUs	https://doi.org/10.3389/fmicb.2015.01403
18	Hird et al.,	2016	Comparative gut microbiota of 59 neotropical bird species	59	Passeriformes	Habia fuscicauda	LC	Central and south america	Costa Rica-Peru	wild	corpse	NA	116	16S V6	Metabarcoding Illumina Hiseq	Y	qualitative	Habitat types	NA	Not explicit	Y	N	Observed OTUs	https://doi.org/10.3389/fmicb.2015.01403
18	Hird et al.,	2016	Comparative gut microbiota of 59 neotropical bird species	59	Passeriformes	Arremon aurantiirostris	LC	Central and south america	Costa Rica-Peru	wild	corpse	NA	116	16S V6	Metabarcoding Illumina Hiseq	Y	qualitative	Habitat types	NA	Not explicit	Y	N	Observed OTUs	https://doi.org/10.3389/fmicb.2015.01403
18	Hird et al.,	2016	Comparative gut microbiota of 59 neotropical bird species	59	Passeriformes	Arremonops conirostris	LC	Central and south america	Costa Rica-Peru	wild	corpse	NA	116	16S V6	Metabarcoding Illumina Hiseq	Y	qualitative	Habitat types	NA	Not explicit	Y	N	Observed OTUs	https://doi.org/10.3389/fmicb.2015.01403
18	Hird et al.,	2016	Comparative gut microbiota of 59 neotropical bird species	59	Passeriformes	Formicarius analis	LC	Central and south america	Costa Rica-Peru	wild	corpse	NA	116	16S V6	Metabarcoding Illumina Hiseq	Y	qualitative	Habitat types	NA	Not explicit	Y	N	Observed OTUs	https://doi.org/10.3389/fmicb.2015.01403
18	Hird et al.,	2016	Comparative gut microbiota of 59 neotropical bird species	59	Passeriformes	Automolus ochrolaemus	LC	Central and south america	Costa Rica-Peru	wild	corpse	NA	116	16S V6	Metabarcoding Illumina Hiseq	Y	qualitative	Habitat types	NA	Not explicit	Y	N	Observed OTUs	https://doi.org/10.3389/fmicb.2015.01403
18	Hird et al.,	2016	Comparative gut microbiota of 59 neotropical bird species	59	Passeriformes	Dendrocincla fuliginosa	LC	Central and south america	Costa Rica-Peru	wild	corpse	NA	116	16S V6	Metabarcoding Illumina Hiseq	Y	qualitative	Habitat types	NA	Not explicit	Y	N	Observed OTUs	https://doi.org/10.3389/fmicb.2015.01403
18	Hird et al.,	2016	Comparative gut microbiota of 59 neotropical bird species	59	Passeriformes	Glyphorynchus spirurus	LC	Central and south america	Costa Rica-Peru	wild	corpse	NA	116	16S V6	Metabarcoding Illumina Hiseq	Y	qualitative	Habitat types	NA	Not explicit	Y	N	Observed OTUs	https://doi.org/10.3389/fmicb.2015.01403
18	Hird et al.,	2016	Comparative gut microbiota of 59 neotropical bird species	59	Passeriformes	Xiphorhynchus susurrans	LC	Central and south america	Costa Rica-Peru	wild	corpse	NA	116	16S V6	Metabarcoding Illumina Hiseq	Y	qualitative	Habitat types	NA	Not explicit	Y	N	Observed OTUs	https://doi.org/10.3389/fmicb.2015.01403
18	Hird et al.,	2016	Comparative gut microbiota of 59 neotropical bird species	59	Passeriformes	Cacicus uropygialis	LC	Central and south america	Costa Rica-Peru	wild	corpse	NA	116	16S V6	Metabarcoding Illumina Hiseq	Y	qualitative	Habitat types	NA	Not explicit	Y	N	Observed OTUs	https://doi.org/10.3389/fmicb.2015.01403
18	Hird et al.,	2016	Comparative gut microbiota of 59 neotropical bird species	59	Passeriformes	Saltator maximus	LC	Central and south america	Costa Rica-Peru	wild	corpse	NA	116	16S V6	Metabarcoding Illumina Hiseq	Y	qualitative	Habitat types	NA	Not explicit	Y	N	Observed OTUs	https://doi.org/10.3389/fmicb.2015.01403
18	Hird et al.,	2016	Comparative gut microbiota of 59 neotropical bird species	59	Passeriformes	Myiothlypis fulvicauda	LC	Central and south america	Costa Rica-Peru	wild	corpse	NA	116	16S V6	Metabarcoding Illumina Hiseq	Y	qualitative	Habitat types	NA	Not explicit	Y	N	Observed OTUs	https://doi.org/10.3389/fmicb.2015.01403
18	Hird et al.,	2016	Comparative gut microbiota of 59 neotropical bird species	59	Passeriformes	Manacus candei	LC	Central and south america	Costa Rica-Peru	wild	corpse	NA	116	16S V6	Metabarcoding Illumina Hiseq	Y	qualitative	Habitat types	NA	Not explicit	Y	N	Observed OTUs	https://doi.org/10.3389/fmicb.2015.01403
18	Hird et al.,	2016	Comparative gut microbiota of 59 neotropical bird species	59	Passeriformes	Manacus aurantiacus	LC	Central and south america	Costa Rica-Peru	wild	corpse	NA	116	16S V6	Metabarcoding Illumina Hiseq	Y	qualitative	Habitat types	NA	Not explicit	Y	N	Observed OTUs	https://doi.org/10.3389/fmicb.2015.01403
18	Hird et al.,	2016	Comparative gut microbiota of 59 neotropical bird species	59	Passeriformes	Ceratopipra mentalis	LC	Central and south america	Costa Rica-Peru	wild	corpse	NA	116	16S V6	Metabarcoding Illumina Hiseq	Y	qualitative	Habitat types	NA	Not explicit	Y	N	Observed OTUs	https://doi.org/10.3389/fmicb.2015.01403
18	Hird et al.,	2016	Comparative gut microbiota of 59 neotropical bird species	59	Passeriformes	Cymbilaimus lineatus	LC	Central and south america	Costa Rica-Peru	wild	corpse	NA	116	16S V6	Metabarcoding Illumina Hiseq	Y	qualitative	Habitat types	NA	Not explicit	Y	N	Observed OTUs	https://doi.org/10.3389/fmicb.2015.01403
18	Hird et al.,	2016	Comparative gut microbiota of 59 neotropical bird species	59	Passeriformes	Gymnopithys leucaspis	LC	Central and south america	Costa Rica-Peru	wild	corpse	NA	116	16S V6	Metabarcoding Illumina Hiseq	Y	qualitative	Habitat types	NA	Not explicit	Y	N	Observed OTUs	https://doi.org/10.3389/fmicb.2015.01403
18	Hird et al.,	2016	Comparative gut microbiota of 59 neotropical bird species	59	Passeriformes	Hylophylax naevioides	LC	Central and south america	Costa Rica-Peru	wild	corpse	NA	116	16S V6	Metabarcoding Illumina Hiseq	Y	qualitative	Habitat types	NA	Not explicit	Y	N	Observed OTUs	https://doi.org/10.3389/fmicb.2015.01403
18	Hird et al.,	2016	Comparative gut microbiota of 59 neotropical bird species	59	Passeriformes	Microrhopias quixensis	LC	Central and south america	Costa Rica-Peru	wild	corpse	NA	116	16S V6	Metabarcoding Illumina Hiseq	Y	qualitative	Habitat types	NA	Not explicit	Y	N	Observed OTUs	https://doi.org/10.3389/fmicb.2015.01403
18	Hird et al.,	2016	Comparative gut microbiota of 59 neotropical bird species	59	Passeriformes	Myrmeciza exsul	LC	Central and south america	Costa Rica-Peru	wild	corpse	NA	116	16S V6	Metabarcoding Illumina Hiseq	Y	qualitative	Habitat types	NA	Not explicit	Y	N	Observed OTUs	https://doi.org/10.3389/fmicb.2015.01403
18	Hird et al.,	2016	Comparative gut microbiota of 59 neotropical bird species	59	Passeriformes	Chlorophanes spiza	LC	Central and south america	Costa Rica-Peru	wild	corpse	NA	116	16S V6	Metabarcoding Illumina Hiseq	Y	qualitative	Habitat types	NA	Not explicit	Y	N	Observed OTUs	https://doi.org/10.3389/fmicb.2015.01403
18	Hird et al.,	2016	Comparative gut microbiota of 59 neotropical bird species	59	Passeriformes	Oryzoborus funereus	LC	Central and south america	Costa Rica-Peru	wild	corpse	NA	116	16S V6	Metabarcoding Illumina Hiseq	Y	qualitative	Habitat types	NA	Not explicit	Y	N	Observed OTUs	https://doi.org/10.3389/fmicb.2015.01403
18	Hird et al.,	2016	Comparative gut microbiota of 59 neotropical bird species	59	Passeriformes	Ramphocelus costaricensis	LC	Central and south america	Costa Rica-Peru	wild	corpse	NA	116	16S V6	Metabarcoding Illumina Hiseq	Y	qualitative	Habitat types	NA	Not explicit	Y	N	Observed OTUs	https://doi.org/10.3389/fmicb.2015.01403
18	Hird et al.,	2016	Comparative gut microbiota of 59 neotropical bird species	59	Passeriformes	Ramphocelus passerinii	LC	Central and south america	Costa Rica-Peru	wild	corpse	NA	116	16S V6	Metabarcoding Illumina Hiseq	Y	qualitative	Habitat types	NA	Not explicit	Y	N	Observed OTUs	https://doi.org/10.3389/fmicb.2015.01403
18	Hird et al.,	2016	Comparative gut microbiota of 59 neotropical bird species	59	Passeriformes	Sporophila corvina	LC	Central and south america	Costa Rica-Peru	wild	corpse	NA	116	16S V6	Metabarcoding Illumina Hiseq	Y	qualitative	Habitat types	NA	Not explicit	Y	N	Observed OTUs	https://doi.org/10.3389/fmicb.2015.01403
18	Hird et al.,	2016	Comparative gut microbiota of 59 neotropical bird species	59	Passeriformes	Tachyphonus luctuosus	LC	Central and south america	Costa Rica-Peru	wild	corpse	NA	116	16S V6	Metabarcoding Illumina Hiseq	Y	qualitative	Habitat types	NA	Not explicit	Y	N	Observed OTUs	https://doi.org/10.3389/fmicb.2015.01403
18	Hird et al.,	2016	Comparative gut microbiota of 59 neotropical bird species	59	Passeriformes	Tangara larvata	LC	Central and south america	Costa Rica-Peru	wild	corpse	NA	116	16S V6	Metabarcoding Illumina Hiseq	Y	qualitative	Habitat types	NA	Not explicit	Y	N	Observed OTUs	https://doi.org/10.3389/fmicb.2015.01403
18	Hird et al.,	2016	Comparative gut microbiota of 59 neotropical bird species	59	Passeriformes	Tangara gyrola	LC	Central and south america	Costa Rica-Peru	wild	corpse	NA	116	16S V6	Metabarcoding Illumina Hiseq	Y	qualitative	Habitat types	NA	Not explicit	Y	N	Observed OTUs	https://doi.org/10.3389/fmicb.2015.01403
18	Hird et al.,	2016	Comparative gut microbiota of 59 neotropical bird species	59	Passeriformes	Volatinia jacarina	LC	Central and south america	Costa Rica-Peru	wild	corpse	NA	116	16S V6	Metabarcoding Illumina Hiseq	Y	qualitative	Habitat types	NA	Not explicit	Y	N	Observed OTUs	https://doi.org/10.3389/fmicb.2015.01403
18	Hird et al.,	2016	Comparative gut microbiota of 59 neotropical bird species	59	Passeriformes	Thraupis episcopus	LC	Central and south america	Costa Rica-Peru	wild	corpse	NA	116	16S V6	Metabarcoding Illumina Hiseq	Y	qualitative	Habitat types	NA	Not explicit	Y	N	Observed OTUs	https://doi.org/10.3389/fmicb.2015.01403
18	Hird et al.,	2016	Comparative gut microbiota of 59 neotropical bird species	59	Passeriformes	Tityra inquisitor	LC	Central and south america	Costa Rica-Peru	wild	corpse	NA	116	16S V6	Metabarcoding Illumina Hiseq	Y	qualitative	Habitat types	NA	Not explicit	Y	N	Observed OTUs	https://doi.org/10.3389/fmicb.2015.01403
18	Hird et al.,	2016	Comparative gut microbiota of 59 neotropical bird species	59	Passeriformes	Cantorchilus nigricapillus	LC	Central and south america	Costa Rica-Peru	wild	corpse	NA	116	16S V6	Metabarcoding Illumina Hiseq	Y	qualitative	Habitat types	NA	Not explicit	Y	N	Observed OTUs	https://doi.org/10.3389/fmicb.2015.01403
18	Hird et al.,	2016	Comparative gut microbiota of 59 neotropical bird species	59	Passeriformes	Henicorhina leucosticta	LC	Central and south america	Costa Rica-Peru	wild	corpse	NA	116	16S V6	Metabarcoding Illumina Hiseq	Y	qualitative	Habitat types	NA	Not explicit	Y	N	Observed OTUs	https://doi.org/10.3389/fmicb.2015.01403
18	Hird et al.,	2016	Comparative gut microbiota of 59 neotropical bird species	59	Passeriformes	Turdus grayi	LC	Central and south america	Costa Rica-Peru	wild	corpse	NA	116	16S V6	Metabarcoding Illumina Hiseq	Y	qualitative	Habitat types	NA	Not explicit	Y	N	Observed OTUs	https://doi.org/10.3389/fmicb.2015.01403
18	Hird et al.,	2016	Comparative gut microbiota of 59 neotropical bird species	59	Passeriformes	Attila spadiceus	LC	Central and south america	Costa Rica-Peru	wild	corpse	NA	116	16S V6	Metabarcoding Illumina Hiseq	Y	qualitative	Habitat types	NA	Not explicit	Y	N	Observed OTUs	https://doi.org/10.3389/fmicb.2015.01403
18	Hird et al.,	2016	Comparative gut microbiota of 59 neotropical bird species	59	Passeriformes	Elaenia flavogaster	LC	Central and south america	Costa Rica-Peru	wild	corpse	NA	116	16S V6	Metabarcoding Illumina Hiseq	Y	qualitative	Habitat types	NA	Not explicit	Y	N	Observed OTUs	https://doi.org/10.3389/fmicb.2015.01403
18	Hird et al.,	2016	Comparative gut microbiota of 59 neotropical bird species	59	Passeriformes	Mionectes oleagineus	LC	Central and south america	Costa Rica-Peru	wild	corpse	NA	116	16S V6	Metabarcoding Illumina Hiseq	Y	qualitative	Habitat types	NA	Not explicit	Y	N	Observed OTUs	https://doi.org/10.3389/fmicb.2015.01403
18	Hird et al.,	2016	Comparative gut microbiota of 59 neotropical bird species	59	Passeriformes	Myiarchus tuberculifer	LC	Central and south america	Costa Rica-Peru	wild	corpse	NA	116	16S V6	Metabarcoding Illumina Hiseq	Y	qualitative	Habitat types	NA	Not explicit	Y	N	Observed OTUs	https://doi.org/10.3389/fmicb.2015.01403
18	Hird et al.,	2016	Comparative gut microbiota of 59 neotropical bird species	59	Passeriformes	Myiozetetes granadensis	LC	Central and south america	Costa Rica-Peru	wild	corpse	NA	116	16S V6	Metabarcoding Illumina Hiseq	Y	qualitative	Habitat types	NA	Not explicit	Y	N	Observed OTUs	https://doi.org/10.3389/fmicb.2015.01403
18	Hird et al.,	2016	Comparative gut microbiota of 59 neotropical bird species	59	Passeriformes	Myiozetetes similis	LC	Central and south america	Costa Rica-Peru	wild	corpse	NA	116	16S V6	Metabarcoding Illumina Hiseq	Y	qualitative	Habitat types	NA	Not explicit	Y	N	Observed OTUs	https://doi.org/10.3389/fmicb.2015.01403
18	Hird et al.,	2016	Comparative gut microbiota of 59 neotropical bird species	59	Passeriformes	Onychorhynchus coronatus	LC	Central and south america	Costa Rica-Peru	wild	corpse	NA	116	16S V6	Metabarcoding Illumina Hiseq	Y	qualitative	Habitat types	NA	Not explicit	Y	N	Observed OTUs	https://doi.org/10.3389/fmicb.2015.01403
18	Hird et al.,	2016	Comparative gut microbiota of 59 neotropical bird species	59	Passeriformes	Platyrinchus coronatus	LC	Central and south america	Costa Rica-Peru	wild	corpse	NA	116	16S V6	Metabarcoding Illumina Hiseq	Y	qualitative	Habitat types	NA	Not explicit	Y	N	Observed OTUs	https://doi.org/10.3389/fmicb.2015.01403
18	Hird et al.,	2016	Comparative gut microbiota of 59 neotropical bird species	59	Passeriformes	Tolmomyias sulphurescens	LC	Central and south america	Costa Rica-Peru	wild	corpse	NA	116	16S V6	Metabarcoding Illumina Hiseq	Y	qualitative	Habitat types	NA	Not explicit	Y	N	Observed OTUs	https://doi.org/10.3389/fmicb.2015.01403
18	Hird et al.,	2016	Comparative gut microbiota of 59 neotropical bird species	59	Passeriformes	Hylophilus flavipes	LC	Central and south america	Costa Rica-Peru	wild	corpse	NA	116	16S V6	Metabarcoding Illumina Hiseq	Y	qualitative	Habitat types	NA	Not explicit	Y	N	Observed OTUs	https://doi.org/10.3389/fmicb.2015.01403
18	Hird et al.,	2016	Comparative gut microbiota of 59 neotropical bird species	59	Piciformes	Galbula ruficauda	LC	Central and south america	Costa Rica-Peru	wild	corpse	NA	116	16S V6	Metabarcoding Illumina Hiseq	Y	qualitative	Habitat types	NA	Not explicit	Y	N	Observed OTUs	https://doi.org/10.3389/fmicb.2015.01403
18	Hird et al.,	2016	Comparative gut microbiota of 59 neotropical bird species	59	Piciformes	Melanerpes pucherani	LC	Central and south america	Costa Rica-Peru	wild	corpse	NA	116	16S V6	Metabarcoding Illumina Hiseq	Y	qualitative	Habitat types	NA	Not explicit	Y	N	Observed OTUs	https://doi.org/10.3389/fmicb.2015.01403
18	Hird et al.,	2016	Comparative gut microbiota of 59 neotropical bird species	59	Piciformes	Pteroglossus torquatus	LC	Central and south america	Costa Rica-Peru	wild	corpse	NA	116	16S V6	Metabarcoding Illumina Hiseq	Y	qualitative	Habitat types	NA	Not explicit	Y	N	Observed OTUs	https://doi.org/10.3389/fmicb.2015.01403
18	Hird et al.,	2016	Comparative gut microbiota of 59 neotropical bird species	59	Trogoniformes	Trogon massena	LC	Central and south america	Costa Rica-Peru	wild	corpse	NA	116	16S V6	Metabarcoding Illumina Hiseq	Y	qualitative	Habitat types	NA	Not explicit	Y	N	Observed OTUs	https://doi.org/10.3389/fmicb.2015.01403
18	Hird et al.,	2016	Comparative gut microbiota of 59 neotropical bird species	59	Trogoniformes	Trogon rufus	LC	Central and south america	Costa Rica-Peru	wild	corpse	NA	116	16S V6	Metabarcoding Illumina Hiseq	Y	qualitative	Habitat types	NA	Not explicit	Y	N	Observed OTUs	https://doi.org/10.3389/fmicb.2015.01403
19	Li et al.,	2019	Environmental filtering increases with elevation for the assembly of gut microbiota in wild pikas	1	Lagomorpha	Ochotona curzoniae	LC	Asia	China	wild	corpse	NA	85	16S V4-V5	Metabarcoding Illumina Miseq	Y	qualitative	Habitat types	NA	Not explicit	N	Y	Observed OTUs y Shannon	https://doi.org/10.1111/1751-7915.13450
20	Delgado et al.,	2017	Intestinal Microbial Community Dynamics of White-Tailed Deer (Odocoileus virginianus) in an Agroecosystem	1	Artiodactyla	Odocoileus virginianus	LC	North America	EEUU	wild	stools	fresh	66	16S V5-V3	Pyrosenquenced 454 GS Junior	N	NA	NA	NA	NA	NA	N	Observed OTUs, Shannon	https://doi.org/10.1007/s00248-017-0961-7
21	Menke et al.,	2017	Effects of host traits and land-use changes on the gut microbiota of the Namibian black-backed jackal (Canis mesomelas)	1	Carnivora	Canis mesomelas	LC	Africa	Namibia	wild	corpse	NA	50	16S V4	Metabarcoding Illumina Miseq	Y	qualitative	Habitat types	NA	Explicit	Y	N	Shannon, PD	https://doi.org/10.1093/femsec/fix123
22	Sottas et al.,	2021	Gut microbiota in two recently diverged passerine species: evaluating the effects of species identity, habitat use and geographic distance	2	Passeriformes	Luscinia megarhyncho	LC	Europe	Poland	wild	corpse	NA	36	16S V3-V4	Metabarcoding Illumina Miseq	N	NA	NA	NA	NA	NA	N	Chao1, Observed OTUs, Shannon	https://doi.org/10.1186/s12862-021-01773-1
22	Sottas et al.,	2021	Gut microbiota in two recently diverged passerine species: evaluating the effects of species identity, habitat use and geographic distance	2	Passeriformes	Luscinia luscinia	LC	Europe	Poland	wild	corpse	NA	36	16S V3-V4	Metabarcoding Illumina Miseq	N	NA	NA	NA	NA	NA	N	Chao1, Observed OTUs, Shannon	https://doi.org/10.1186/s12862-021-01773-1
23	Wu et al.,	2018	Habitat environments impacted the gut microbiome of long-distance migratory swan geese but central species conserved	1	Anseriformes	Anser cygnoides	VU	Asia	China-Mongolia	wild	stools	fresh	40	16S V4	Metabarcoding Illumina Miseq	Y	qualitative	Habitat types	NA	Explicit	Y	N	Shannon, Chao1	https://doi.org/10.1038/s41598-018-31731-9
24	Trosvik et al.,	2018	Ecological plasticity in the gastrointestinal microbiomes of Ethiopian Chlorocebus monkeys	1	Primate	Chlorocebus etíopes	LC	Africa	Ethiopia	wild	stools	fresh	219	16S V4	Metabarcoding Illumina Miseq	Y	qualitative	Habitat types	NA	Explicit	Y	N	Observed OTUs, Chao1, Shannon	https://doi.org/10.1038/s41598-017-18435-2
25	Teyssier et al.,	2018	Inside the guts of the city: Urban-induced alterations of the gut microbiota in a wild passerine	1	Passeriformes	Passer domesticus	LC	Europe	Belgium	wild	stools	fresh	405	16S V5-V6	Metabarcoding Illumina Miseq	Y	qualitative/quantitative	Habitat types	% landscape urbanisation	Explicit	Y	Y	Observed OTUs, Shannon	https://doi.org/10.1016/j.scitotenv.2017.09.035
26	Wu et al.,	2017	Analysis and comparison of the wolf microbiome under different environmental factors using three different data of Next Generation Sequencing	2	Carnivora	Canis lupus desertorum	LC	Asia	China	captive	stools	fresh	18	16S V3-V4	Metabarcoding Illumina Hiseq	N	NA	NA	NA	NA	NA	N	Observed OTUs, Simpson,Shannon, Chao1, ACE	https://doi.org/10.1038/s41598-017-11770-4
26	Wu et al.,	2017	Analysis and comparison of the wolf microbiome under different environmental factors using three different data of Next Generation Sequencing	2	Carnivora	Canis lupus familiaris	NA	Asia	China	captive	stools	fresh	18	16S V3-V4	Metabarcoding Illumina Hiseq	N	NA	NA	NA	NA	NA	N	Observed OTUs, Simpson,Shannon, Chao1, ACE	https://doi.org/10.1038/s41598-017-11770-4
27	Delport et al.,	2016	Colony location and captivity influence the gut microbial community composition of the Australian sea lion (Neophoca cinerea)	1	Carnivora	Neophoca cinerea	EN	Oceania	Australia	wild/captive	stools	fresh	43	16S V1-V3	Metabarcoding Illumina Miseq	N	NA	NA	NA	NA	NA	N	Observed OTUs	https://doi.org/10.1128/AEM.00192-16
28	Lavrinienko et al.,	2018	Environmental radiation alters the gut microbiome of the bank vole Myodes glareolus	1	Rodentia	Myodes glareolus	LC	Europe	Ukraine	wild	stools	fresh	137	16S V4	Metabarcoding Illumina Hiseq	Y	qualitative	contamination	NA	Explicit	Y	N	Observed OTUs, evenness, Shannon	https://doi.org/10.1038/s41396-018-0214-x
29	Antwis et al.,	2018	Gut microbiome composition is associated with spatial structuring and social interactions in semi-feral Welsh Mountain ponies	1	Perissodactyla	Equus ferus caballus	EN	Europe	Gales	wild	stools	fresh	30	16S V4	Metabarcoding Illumina Miseq	N	NA	NA	NA	NA	NA	NA	NA	https://doi.org/10.1186/s40168-018-0593-2
30	Petrelli et al.,	2021	Population genomic, olfactory, dietary, and gut microbiota analyses demonstrate the unique evolutionary trajectory of feral pigs	1	Artiodactyla	Sus scrofa	LC	Europe	Italy	wild/captive	stools	fresh	25	16S V3	Metabarcoding Illumina Miseq	N	NA	NA	NA	NA	NA	NA	NA	https://doi.org/10.1111/mec.16238
31	Guo et al.,	2021	Seasonal dynamics of diet–gut microbiota interaction in adaptation of yaks to life at high altitude	1	Artiodactyla	Bos mutus	VU	Asia	China	wild	stools	fresh	300	16S V3-V4	Metabarcoding Illumina Hiseq	N	NA	NA	NA	NA	NA	NA	Observed OTUs	https://doi.org/10.1038/s41522-021-00207-6
32	Hayakawa et al.,	2018	First report of foregut microbial community in proboscis monkeys: are diverse forests a reservoir for diverse microbiomes?	1	Primate	Nasalis larvatus	EN	Asia	Malasia	wild	other	NA	6	16S V1-V2, V3-V4	Metabarcoding Illumina MiSeq	Y	qualitative	Habitat types	NA	Explicit	Y	NA	Observed OTUs, Shannon	https://doi.org/10.1111/1758-2229.12677
33	Baldo et al.,	2018	Processes shaping gut microbiota diversity in allopatric populations of the endemic lizard Podarcis lilfordi from Menorcan islets (Balearic Islands)	1	Squamata	Podarcis lilford	EN	Europe	Islas Baleares	wild	corpse	NA	33	16S V3-V4	Metabarcoding Illumina Miseq	N	NA	NA	NA	NA	NA	N	PD, Shannon	https://doi.org/10.1093/femsec/fix186
34	Huang et al.,	2018	Composition and functional specialists of the gut microbiota of frogs reflect habitat differences and agricultural activity	2	Anura	Fejervarya limnocharis	LC	Asia	Taiwan	wild	corpse	NA	12	16S V4	Pyrosequenced 454 FLX Titanium	Y	qualitative	Habitat types	NA	Explicit	Y	N	Observed OTUs, Shannon, Chao1, Simpson	https://doi.org/10.3389/fmicb.2017.02670
34	Huang et al.,	2018	Composition and functional specialists of the gut microbiota of frogs reflect habitat differences and agricultural activity	2	Anura	Babina adenopleura	LC	Asia	Taiwan	wild	corpse	NA	12	16S V4	Pyrosequenced 454 FLX Titanium	Y	qualitative	Habitat types	NA	Explicit	Y	N	Observed OTUs, Shannon, Chao1, Simpson	https://doi.org/10.3389/fmicb.2017.02670
35	Ingala et al.,	2019	Habitat fragmentation is associated with dietary shifts and microbiota variability in common vampire bats	1	Chiroptera	Desmodus rotundus	LC	Central america	belize	wild	rectal swab	NA	30	16S V4	Metabarcoding Illumina Miseq	Y	qualitative	Habitat types	NA	Explicit	Y	N	Shannon	https://doi.org/10.1002/ece3.5228
36	Gillingham et al.,	2019	Offspring Microbiomes Differ Across Breeding Sites in a Panmictic Species	1	Phoenicopteriformes	Phoenicopterus roseus	LC	Europe	France, Spain, Italy, Tunez	wild	rectal swab	NA	814	16S V4	Metabarcoding Illumina Miseq	N	NA	NA	NA	NA	NA	Y	PD	https://doi.org/10.3389/fmicb.2019.00035
37	Watson et al.,	2019	Global change-driven use of onshore habitat impacts polar bear faecal microbiota	1	Carnivora	Ursus maritimus	VU	North America	Alaska	wild	stools	fresh	112	16S V3-V4	Metabarcoding Illumina Miseq	N	NA	NA	NA	NA	NA	Y	Shannon, inverse simpson, PD, Observed OTUs	https://doi.org/10.1038/s41396-019-0480-2
38	Wang et al.,	2019	Pere David's deer gut microbiome changes across captive and translocated populations: Implications for conservation	1	Artiodactyla	Elaphurus davidianus	EW	Asia	China	wild/captive	stools	fresh	245	16S V4-V5	Metabarcoding Illumina Miseq	Y	qualitative	wild/captive	NA	Not explicit	N	Y	Shannon	https://doi.org/10.1111/eva.12743
39	Menke et al.,	2019	Impact of winter enclosures on the gut bacterial microbiota of red deer in the Bavarian Forest National Park	1	Artiodactyla	Cervus elaphus	LC	Europe	Germany	wild	stools	fresh	136	16S	Metabarcoding Illumina Miseq	Y	qualitative	Habitat types	NA	Not explicit	Y	Y	PD	https://doi.org/10.2981/wlb.00503
40	Littleford-Colquhoun et al.,	2019	City life alters the gut microbiome and stable isotope profiling of the eastern water dragon (Intellagama lesueurii)	1	Squamata	Intelligama lesueurii	LC	Oceania	Australia	wild	stools	fresh	79	16S V3-V4	Metabarcoding Illumina Miseq	Y	qualitative	Habitat types	NA	Explicit	Y	Y	PD, Shannon, OTUs	https://doi.org/10.1111/mec.15240
41	Lee W et al.,	2019	Gut microbiota composition of Japanese macaques associates with extent of human encroachment	1	Primate	Macaca fuscata	LC	Asia	Japan	wild/captive	stools	fresh	70	16S V3-V4	Metabarcoding Illumina Miseq	Y	qualitative	Habitat types	NA	Explicit	Y	Y	Shannon, Observed OTUs	https://doi.org/10.1002/ajp.23072
42	Karmacharya et al.,	2019	Gut microbiota and their putative metabolic functions in fragmented Bengal tiger population of Nepal	1	Carnivora	Panthera tigris tigris	EN	Asia	Nepal	wild	stools	NA	70	16S V4	Metabarcoding Illumina Miseq	Y	qualitative	Habitat types	NA	Explicit	Y	N	Chao1, ace, shannon, simpson,inverted simpson, PD	https://doi.org/10.1371/journal.pone.0221868
43	Haworth et al.,	2019	Space, time and captivity: quantifying the factors influencing the fecal microbiome of an alpine ungulate	1	Artiodactyla	Oreamnos americanus	LC	North America	Canada	wild/captive	stools	fresh	54	16S V3-V4	Metabarcoding Illumina Miseq	Y	qualitative	wild/captive	NA	Not explicit	Y	N	Observed OTUs. Shannon, Evenness	https://doi.org/10.1093/femsec/fiz095
44	Dong et al.,	2019	Variations in gut bacterial communities of hooded crane (Grus monacha) over spatial-temporal scales	1	Gruiformes	Grus monacha	VU	Asia	China	wild	stools	fresh	87	16S V3-V4	Metabarcoding Illumina Hiseq	N	NA	NA	NA	NA	NA	Y	Shannon, PD, Chao1, Observed OTUs	https://doi.org/10.7717/peerj.7045
45	Lavrinienko et al.,	2020	Applying the Anna Karenina principle for wild animal gut microbiota: Temporal stability of the bank vole gut microbiota in a disturbed environment	1	Rodentia	Myodes glareolus	LC	Europe	Ukraine	wild	stools	fresh	56	16S V4	Metabarcoding Illumina Miseq	Y	qualitative	contamination	NA	Explicit	Y	N	Shannon, Observed ASVs	https://doi.org/10.1111/1365-2656.13342
46	Barelli et al.,	2020	The Gut Microbiota Communities of Wild Arboreal and Ground-Feeding Tropical Primates Are Affected Differently by Habitat Disturbance	2	Primate	Papio cynocephalus	LC	Africa	Tanzania	wild	stools	fresh	158	16S V1-V2	Metabarcoding Illumina Miseq	Y	qualitative	Habitat types	NA	Explicit	Y	Y	Shannon	https://doi.org/10.1128/mSystems.00061-20
46	Barelli et al.,	2020	The Gut Microbiota Communities of Wild Arboreal and Ground-Feeding Tropical Primates Are Affected Differently by Habitat Disturbance	2	Primate	Procolobus gordonorum	VU	Africa	Tanzania	wild	stools	fresh	158	16S V1-V3	Metabarcoding Illumina Miseq	Y	qualitative	Habitat types	NA	Explicit	Y	Y	Shannon	https://doi.org/10.1128/mSystems.00061-20
47	Ghosh et al.,	2019	Linking gut microbiome with the feeding behavior of the Arunachal macaque (Macaca munzala)	1	Primate	Macaca munzala	EN	Asia	India	wild	stools	fresh	11	16S V3-V4	Metabarcoding Illumina Miseq/Hiseq	N	NA	NA	NA	NA	NA	N	Observed OTUs, ACE, Chao1, Shannon, Simpson, Inverse Simpson	https://doi.org/10.1038/s41598-021-01316-0
48	Greene et al.,	2019	Local habitat, not phylogenetic relatedness, predicts gut microbiota better within folivorous than frugivorous lemur lineages	12	Primate	Eulemur coronatus	EN	Africa	Madagascar	wild	stools	fresh	128	16S V4	Metabarcoding Illumina Miseq	N	NA	NA	NA	NA	NA	N	Shannon, PD	https://doi.org/10.1098/rsbl.2019.0028
48	Greene et al.,	2019	Local habitat, not phylogenetic relatedness, predicts gut microbiota better within folivorous than frugivorous lemur lineages	12	Primate	Eulemur rubriventer	VU	Africa	Madagascar	wild	stools	fresh	128	16S V4	Metabarcoding Illumina Miseq	N	NA	NA	NA	NA	NA	N	Shannon, PD	https://doi.org/10.1098/rsbl.2019.0028
48	Greene et al.,	2019	Local habitat, not phylogenetic relatedness, predicts gut microbiota better within folivorous than frugivorous lemur lineages	12	Primate	Eulemur mongoz	CR	Africa	Madagascar	wild	stools	fresh	128	16S V4	Metabarcoding Illumina Miseq	N	NA	NA	NA	NA	NA	N	Shannon, PD	https://doi.org/10.1098/rsbl.2019.0028
48	Greene et al.,	2019	Local habitat, not phylogenetic relatedness, predicts gut microbiota better within folivorous than frugivorous lemur lineages	12	Primate	Eulemur rufifrons	VU	Africa	Madagascar	wild	stools	fresh	128	16S V4	Metabarcoding Illumina Miseq	N	NA	NA	NA	NA	NA	N	Shannon, PD	https://doi.org/10.1098/rsbl.2019.0028
48	Greene et al.,	2019	Local habitat, not phylogenetic relatedness, predicts gut microbiota better within folivorous than frugivorous lemur lineages	12	Primate	Eulemur fulvus	VU	Africa	Madagascar	wild	stools	fresh	128	16S V4	Metabarcoding Illumina Miseq	N	NA	NA	NA	NA	NA	N	Shannon, PD	https://doi.org/10.1098/rsbl.2019.0028
48	Greene et al.,	2019	Local habitat, not phylogenetic relatedness, predicts gut microbiota better within folivorous than frugivorous lemur lineages	12	Primate	Eulemur albifrons	VU	Africa	Madagascar	wild	stools	fresh	128	16S V4	Metabarcoding Illumina Miseq	N	NA	NA	NA	NA	NA	N	Shannon, PD	https://doi.org/10.1098/rsbl.2019.0028
48	Greene et al.,	2019	Local habitat, not phylogenetic relatedness, predicts gut microbiota better within folivorous than frugivorous lemur lineages	12	Primate	Propithecus diadema	CR	Africa	Madagascar	wild	stools	fresh	128	16S V4	Metabarcoding Illumina Miseq	N	NA	NA	NA	NA	NA	N	Shannon, PD	https://doi.org/10.1098/rsbl.2019.0028
48	Greene et al.,	2019	Local habitat, not phylogenetic relatedness, predicts gut microbiota better within folivorous than frugivorous lemur lineages	12	Primate	Propithecus edwardsi	EN	Africa	Madagascar	wild	stools	fresh	128	16S V4	Metabarcoding Illumina Miseq	N	NA	NA	NA	NA	NA	N	Shannon, PD	https://doi.org/10.1098/rsbl.2019.0028
48	Greene et al.,	2019	Local habitat, not phylogenetic relatedness, predicts gut microbiota better within folivorous than frugivorous lemur lineages	12	Primate	Propithecus coquereli	CR	Africa	Madagascar	wild	stools	fresh	128	16S V4	Metabarcoding Illumina Miseq	N	NA	NA	NA	NA	NA	N	Shannon, PD	https://doi.org/10.1098/rsbl.2019.0028
48	Greene et al.,	2019	Local habitat, not phylogenetic relatedness, predicts gut microbiota better within folivorous than frugivorous lemur lineages	12	Primate	Propithecus tattersalli	CR	Africa	Madagascar	wild	stools	fresh	128	16S V4	Metabarcoding Illumina Miseq	N	NA	NA	NA	NA	NA	N	Shannon, PD	https://doi.org/10.1098/rsbl.2019.0028
48	Greene et al.,	2019	Local habitat, not phylogenetic relatedness, predicts gut microbiota better within folivorous than frugivorous lemur lineages	12	Primate	Propithecus candidus	CR	Africa	Madagascar	wild	stools	fresh	128	16S V4	Metabarcoding Illumina Miseq	N	NA	NA	NA	NA	NA	N	Shannon, PD	https://doi.org/10.1098/rsbl.2019.0028
48	Greene et al.,	2019	Local habitat, not phylogenetic relatedness, predicts gut microbiota better within folivorous than frugivorous lemur lineages	12	Primate	Propithecus verreauxi	CR	Africa	Madagascar	wild	stools	fresh	128	16S V4	Metabarcoding Illumina Miseq	N	NA	NA	NA	NA	NA	N	Shannon, PD	https://doi.org/10.1098/rsbl.2019.0028
49	Arizza et al.,	2019	New insights into the gut microbiome in loggerhead sea turtles Caretta caretta stranded on the Mediterranean coast	1	Testudines	Caretta caretta	VU	Europe	Italy	captive	stools	fresh	8	16S V3-V4	Metabarcoding illumina Miseq	N	NA	NA	NA	NA	NA	N	Shannon, Chao1, ACE, Simpson, evenness	https://doi.org/10.1371/journal.pone.0220329
50	Orkin et al.,	2019	Small to modest impact of social group on the gut microbiome of wild Costa Rican capuchins in a seasonal forest	1	Primate	Cebus capucinus imitator	VU	Central america	Costa Rica	wild	stools	fresh	62	16S V4	Metabarcoding illumina Miseq	N	NA	NA	NA	NA	NA	NA	NA	https://doi.org/10.1002/ajp.22985
51	Marsh et al.,	2022	Synchronous Seasonality in the Gut Microbiota of Wild Mouse Populations	1	Rodentia	Apodemus sylvaticus	LC	Europe	United kingdom	wild	stools	fresh	1052	16S V4	Metabarcoding illumina Miseq	N	NA	NA	NA	NA	NA	Y	Observed ASVs	https://doi.org/10.3389/fmicb.2022.809735
52	Shu et al.,	2019	High-Throughput Sequencing Analysis Reveals Correlations between Host Phylogeny, Gut Microbiota, and Habitat of Wild Frogs from a Mountainous Area	4	Anura	Odorrana tormota	LC	Asia	China	wild	corpse	NA	19	16S V3-V4	Metabarcoding illumina Miseq	N	NA	NA	NA	NA	NA	N	Chao1	https://doi.org/10.1643/OT-18-040
52	Shu et al.,	2019	High-Throughput Sequencing Analysis Reveals Correlations between Host Phylogeny, Gut Microbiota, and Habitat of Wild Frogs from a Mountainous Area	4	Anura	Amolops wuyiensis	LC	Asia	China	wild	corpse	NA	19	16S V3-V4	Metabarcoding illumina Miseq	N	NA	NA	NA	NA	NA	N	Chao1	https://doi.org/10.1643/OT-18-040
52	Shu et al.,	2019	High-Throughput Sequencing Analysis Reveals Correlations between Host Phylogeny, Gut Microbiota, and Habitat of Wild Frogs from a Mountainous Area	4	Anura	Odorrana schmackeri	LC	Asia	China	wild	corpse	NA	19	16S V3-V4	Metabarcoding illumina Miseq	N	NA	NA	NA	NA	NA	N	Chao1	https://doi.org/10.1643/OT-18-040
52	Shu et al.,	2019	High-Throughput Sequencing Analysis Reveals Correlations between Host Phylogeny, Gut Microbiota, and Habitat of Wild Frogs from a Mountainous Area	4	Anura	Polypedates megacephalus	LC	Asia	China	wild	corpse	NA	19	16S V3-V4	Metabarcoding illumina Miseq	N	NA	NA	NA	NA	NA	N	Chao1	https://doi.org/10.1643/OT-18-040
53	Goertz et al.,	2019	Geographical location influences the composition of the gut microbiota in wild house mice (Mus musculus domesticus) at a fine spatial scale	1	Rodentia	Mus musculus domesticus	LC	Europe	Scotland	wild	corpse	NA	79	16S V4	Metabarcoding illumina Miseq	N	NA	NA	NA	NA	NA	N	Shannon, Simpson	https://doi.org/10.1371/journal.pone.0222501
54	Scheelings et al.,	2020	The gut bacterial microbiota of sea turtles differs between geographically distinct populations	1	Testudines	Natator depressus	DD	Oceania	Australia	wild	rectal swab	NA	57	16S V3-V4	Metabarcoding illumina Miseq	N	NA	NA	NA	NA	NA	Y	Observed OTUs, Shannon, Chao1	https://doi.org/10.3354/esr01042
55	Wang et al.,	2020	Characterization of the gut microbiome of black-necked cranes (Grus nigricollis) in six wintering areas in China	1	Gruiformes	Grus nigricollis	NT	Asia	China	wild	stools	fresh	33	16S V4-V5	Metabarcoding illumina Miseq	N	NA	NA	NA	NA	NA	Y	Shannon. Chao1	https://doi.org/10.1007/s00203-019-01802-0
56	Teyssier et al.,	2020	Diet contributes to urban-induced alterations in gut microbiota: experimental evidence from a wild passerine	1	Passeriformes	Passer domesticus	LC	Europe	France	wild	stools	fresh	114	16S V5-V6	Metabarcoding illumina Miseq	Y	qualitative	Habitat types	NA	Explicit	Y	Y	Shannon, Chao1, Observed OTUs	https://doi.org/10.1098/rspb.2019.2182
57	Sandri et al.,	2020	Fecal Microbiota Characterization of Seychelles Giant Tortoises (Aldabrachelys gigantea) Living in Both Wild and Controlled Environments	1	Testudines	Aldabrachelys gigantea	VU	Europe	Italy	wild/captive	stools	fresh	17	16S V3-V4	Metabarcoding illumina Miseq	Y	qualitative	wild/captive	NA	Not explicit	Y	Y	Shannon, Simpson, Chao	https://doi.org/10.3389/fmicb.2020.569249
58	San Juan et al.,	2020	Land-use change has host-specific influences on avian gut microbiomes	6	Passeriformes	Saltator maximus	LC	Central america	Costa Rica	wild	stools	fresh	280	16S V4	Metabarcoding illumina Miseq	Y	qualitative	Habitat types	NA	Explicit	Y	N	Shannon, Chao1, Observed OTUs	https://doi.org/10.1038/s41396-019-0535-4
58	San Juan et al.,	2020	Land-use change has host-specific influences on avian gut microbiomes	6	Passeriformes	Turdus grayi	LC	Central america	Costa Rica	wild	stools	fresh	280	16S V4	Metabarcoding illumina Miseq	Y	qualitative	Habitat types	NA	Explicit	Y	N	Shannon, Chao1, Observed OTUs	https://doi.org/10.1038/s41396-019-0535-4
58	San Juan et al.,	2020	Land-use change has host-specific influences on avian gut microbiomes	6	Passeriformes	Catharus aurantiirostris	LC	Central america	Costa Rica	wild	stools	fresh	280	16S V4	Metabarcoding illumina Miseq	Y	qualitative	Habitat types	NA	Explicit	Y	N	Shannon, Chao1, Observed OTUs	https://doi.org/10.1038/s41396-019-0535-4
58	San Juan et al.,	2020	Land-use change has host-specific influences on avian gut microbiomes	6	Passeriformes	Catharus ustulatus	LC	Central america	Costa Rica	wild	stools	fresh	280	16S V4	Metabarcoding illumina Miseq	Y	qualitative	Habitat types	NA	Explicit	Y	N	Shannon, Chao1, Observed OTUs	https://doi.org/10.1038/s41396-019-0535-4
58	San Juan et al.,	2020	Land-use change has host-specific influences on avian gut microbiomes	6	Passeriformes	Basileuterus rufifrons	LC	Central america	Costa Rica	wild	stools	fresh	280	16S V4	Metabarcoding illumina Miseq	Y	qualitative	Habitat types	NA	Explicit	Y	N	Shannon, Chao1, Observed OTUs	https://doi.org/10.1038/s41396-019-0535-4
58	San Juan et al.,	2020	Land-use change has host-specific influences on avian gut microbiomes	6	Passeriformes	Dendroica petechia	LC	Central america	Costa Rica	wild	stools	fresh	280	16S V4	Metabarcoding illumina Miseq	Y	qualitative	Habitat types	NA	Explicit	Y	N	Shannon, Chao1, Observed OTUs	https://doi.org/10.1038/s41396-019-0535-4
59	Murray et al.,	2020	Gut microbiome shifts with urbanization and potentially facilitates a zoonotic pathogen in a wading bird	1	Pelecaniformes	Eudocimus albus	LC	North America	EEUU	wild	stools	fresh	82	16S V3-V4	Metabarcoding illumina Miseq	Y	quantitative	NA	Urban land cover gradient	Explicit	Y	N	Shannon	https://doi.org/10.1371/journal.pone.0220926
60	Couch et al.,	2020	Bighorn sheep gut microbiomes associate with genetic and spatial structure across a metapopulation	1	Artiodactyla	Ovis canadensis nelsoni	LC	North America	EEUU	wild	stools	NA	39	16S V3-V4	Metabarcoding illumina Miseq	Y	quantitative	NA	NDVI	Not explicit	Y	N	Observed ASVs	https://doi.org/10.1371/journal.pone.0249521
61	Budd et al.,	2020	Effects of diet, habitat, and phylogeny on the fecal microbiome of wild African savanna (Loxodonta africana) and forest elephants (L. cyclotis)	1	Proboscidea	Loxodonta africana	EN	Africa	Kenya; gabon	wild	stools	fresh	48	16S V4	Metabarcoding illumina Miseq	Y	qualitative	Habitat types	NA	Not explicit	Y	N	Shannon	https://doi.org/10.1002/ece3.6305
61	Budd et al.,	2020	Effects of diet, habitat, and phylogeny on the fecal microbiome of wild African savanna (Loxodonta africana) and forest elephants (L. cyclotis)	1	Proboscidea	Loxodonta cyclistis	CR	Africa	Kenya; gabon	wild	stools	fresh	48	16S V4	Metabarcoding illumina Miseq	Y	qualitative	Habitat types	NA	Not explicit	N	N	Shannon	https://doi.org/10.1002/ece3.6305
62	Moeller et al.,	2017	Dispersal limitation promotes the diversification of the mammalian gut microbiota	17	Carnivora	Canis lupus	LC	North America	EEUU	wild	stools	fresh	204	16S V4	Metabarcoding illumina Miseq	N	NA	NA	NA	NA	NA	NA	NA	https://doi.org/10.1073/pnas.170012211
62	Moeller et al.,	2020	Dispersal limitation promotes the diversification of the mammalian gut microbiota	17	Carnivora	Canis latrans	LC	North America	EEUU	wild	stools	fresh	204	16S V4	Metabarcoding illumina Miseq	N	NA	NA	NA	NA	NA	NA	NA	https://doi.org/10.1073/pnas.170012211
62	Moeller et al.,	2020	Dispersal limitation promotes the diversification of the mammalian gut microbiota	17	Carnivora	Ursus americanus	LC	North America	EEUU	wild	stools	fresh	204	16S V4	Metabarcoding illumina Miseq	N	NA	NA	NA	NA	NA	NA	NA	https://doi.org/10.1073/pnas.170012211
62	Moeller et al.,	2020	Dispersal limitation promotes the diversification of the mammalian gut microbiota	17	Carnivora	Puma concolor	LC	North America	EEUU	wild	stools	fresh	204	16S V4	Metabarcoding illumina Miseq	N	NA	NA	NA	NA	NA	NA	NA	https://doi.org/10.1073/pnas.170012211
62	Moeller et al.,	2020	Dispersal limitation promotes the diversification of the mammalian gut microbiota	17	Carnivora	Lynx rufus	LC	North America	EEUU	wild	stools	fresh	204	16S V4	Metabarcoding illumina Miseq	N	NA	NA	NA	NA	NA	NA	NA	https://doi.org/10.1073/pnas.170012211
62	Moeller et al.,	2020	Dispersal limitation promotes the diversification of the mammalian gut microbiota	17	Artiodactyla	Rangifer tarandus	VU	North America	EEUU	wild	stools	fresh	204	16S V4	Metabarcoding illumina Miseq	N	NA	NA	NA	NA	NA	NA	NA	https://doi.org/10.1073/pnas.170012211
62	Moeller et al.,	2020	Dispersal limitation promotes the diversification of the mammalian gut microbiota	17	Artiodactyla	Odocoileus virginianus	LC	North America	EEUU	wild	stools	fresh	204	16S V4	Metabarcoding illumina Miseq	N	NA	NA	NA	NA	NA	NA	NA	https://doi.org/10.1073/pnas.170012211
62	Moeller et al.,	2020	Dispersal limitation promotes the diversification of the mammalian gut microbiota	17	Artiodactyla	Alces alces	LC	North America	EEUU	wild	stools	fresh	204	16S V4	Metabarcoding illumina Miseq	N	NA	NA	NA	NA	NA	NA	NA	https://doi.org/10.1073/pnas.170012211
62	Moeller et al.,	2020	Dispersal limitation promotes the diversification of the mammalian gut microbiota	17	Artiodactyla	Cervus elaphus	LC	North America	EEUU	wild	stools	fresh	204	16S V4	Metabarcoding illumina Miseq	N	NA	NA	NA	NA	NA	NA	NA	https://doi.org/10.1073/pnas.170012211
62	Moeller et al.,	2020	Dispersal limitation promotes the diversification of the mammalian gut microbiota	17	Rodentia	Ctenomys cf. Knightii	DD	North America	EEUU	wild	stools	fresh	204	16S V4	Metabarcoding illumina Miseq	N	NA	NA	NA	NA	NA	NA	NA	https://doi.org/10.1073/pnas.170012211
62	Moeller et al.,	2020	Dispersal limitation promotes the diversification of the mammalian gut microbiota	17	Rodentia	Microtus californicus	LC	North America	EEUU	wild	stools	fresh	204	16S V4	Metabarcoding illumina Miseq	N	NA	NA	NA	NA	NA	NA	NA	https://doi.org/10.1073/pnas.170012211
62	Moeller et al.,	2020	Dispersal limitation promotes the diversification of the mammalian gut microbiota	17	Rodentia	Onychomys leucogaster	LC	North America	EEUU	wild	stools	fresh	204	16S V4	Metabarcoding illumina Miseq	N	NA	NA	NA	NA	NA	NA	NA	https://doi.org/10.1073/pnas.170012211
62	Moeller et al.,	2020	Dispersal limitation promotes the diversification of the mammalian gut microbiota	17	Rodentia	Peromyscus maniculatus	LC	North America	EEUU	wild	stools	fresh	204	16S V4	Metabarcoding illumina Miseq	N	NA	NA	NA	NA	NA	NA	NA	https://doi.org/10.1073/pnas.170012211
62	Moeller et al.,	2020	Dispersal limitation promotes the diversification of the mammalian gut microbiota	17	Rodentia	Dipodomys ordii	LC	North America	EEUU	wild	stools	fresh	204	16S V4	Metabarcoding illumina Miseq	N	NA	NA	NA	NA	NA	NA	NA	https://doi.org/10.1073/pnas.170012211
62	Moeller et al.,	2020	Dispersal limitation promotes the diversification of the mammalian gut microbiota	17	Rodentia	Perognathus parvus	LC	North America	EEUU	wild	stools	fresh	204	16S V4	Metabarcoding illumina Miseq	N	NA	NA	NA	NA	NA	NA	NA	https://doi.org/10.1073/pnas.170012211
62	Moeller et al.,	2020	Dispersal limitation promotes the diversification of the mammalian gut microbiota	17	Rodentia	Tamias minimus	LC	North America	EEUU	wild	stools	fresh	204	16S V4	Metabarcoding illumina Miseq	N	NA	NA	NA	NA	NA	NA	NA	https://doi.org/10.1073/pnas.170012211
62	Moeller et al.,	2020	Dispersal limitation promotes the diversification of the mammalian gut microbiota	17	Rodentia	Sciurus niger	LC	North America	EEUU	wild	stools	fresh	204	16S V4	Metabarcoding illumina Miseq	N	NA	NA	NA	NA	NA	NA	NA	https://doi.org/10.1073/pnas.170012211
63	Risely et al.,	2017	Gut microbiota of a long‐distance migrant demonstrates resistance against environmental microbe incursions	1	Charadriiformes	Calidris ruficollis	NT	Oceania	Australia	wild	stools	fresh	85	16S V1-V3	Metabarcoding Illumina Miseq	N	NA	NA	NA	NA	NA	Y	Observed OTUs, Shannon	https://doi.org/10.1111/mec.14326
64	Cheng et al.,	2015	The Tasmanian devil microbiome—implications for conservation and management	1	Dasyuromorphia	Sarcophilus harrisii	EN	Oceania	Australia	wild/captive	stools	fresh	11	16S V1-V3	Pyrosequenced Roche 454 GS FLX System	Y	qualitative	wild/captive	NA	Explicit	Y	N	Observed OTUs	https://doi.org/10.1186/s40168-015-0143-0
65	Sugden et al.,	2020	An altered microbiome in urban coyotes mediates relationships between anthropogenic diet and poor health	1	Carnivora	Canis latrans	LC	North America	Canada	wild	corpse	NA	30	16S V4	Metabarcoding Illumina Miseq	Y	qualitative	Habitat types	NA	Explicit	Y	Y	Shannon, PD	https://doi.org/10.1038/s41598-020-78891-1
66	Guo et al.,	2020	The Gut Microbial Community Structure of the North American River Otter (Lontra canadensis) in the Alberta Oil Sands Region in Canada: Relationship with Local Environmental Variables and Metal Body Burden	1	Carnivora	Lontra canadensis	LC	North America	Canada	wild	corpse	NA	18	16S V3-V4	Metabarcoding Illumina Miseq	Y	quantitative	NA	Median human impact score (HI median)	Explicit	Y	N	Shannon, Chao1, PD, Observed ASVs	https://doi.org/10.1002/etc.4876
67	Bletz et al.,	2016	Amphibian gut microbiota shifts differentially in community structure but converges on habitat-specific predicted functions	1	Squamata	Salamandra salamandra	LC	Europe	Germany	wild/captive	corpse	NA	104	16S V4	Metabarcoding Illumina Miseq	N	NA	NA	NA	NA	NA	Y	Chao1, PD, simpson	https://doi.org/10.1038/ncomms13699
68	Knowles et al.,	2019	Species identity dominates over environment in shaping the microbiota of small mammals	10	Rodentia	Apodemus agrarius	LC	Europe	Lithuania	wild	corpse	NA	225	16S V4	Metabarcoding Illumina Miseq	N	NA	NA	NA	NA	NA	N	Shannon, Observed ASVs	https://doi.org/10.1111/ele.13240
68	Knowles et al.,	2020	Species identity dominates over environment in shaping the microbiota of small mammals	10	Rodentia	Apodemus flavicollis	LC	Europe	Lithuania	wild	corpse	NA	225	16S V4	Metabarcoding Illumina Miseq	N	NA	NA	NA	NA	NA	N	Shannon, Observed ASVs	https://doi.org/10.1111/ele.13240
68	Knowles et al.,	2020	Species identity dominates over environment in shaping the microbiota of small mammals	10	Rodentia	Micromys minutus	LC	Europe	Lithuania	wild	corpse	NA	225	16S V4	Metabarcoding Illumina Miseq	N	NA	NA	NA	NA	NA	N	Shannon, Observed ASVs	https://doi.org/10.1111/ele.13240
68	Knowles et al.,	2020	Species identity dominates over environment in shaping the microbiota of small mammals	10	Rodentia	Microtus arvalis	LC	Europe	Lithuania	wild	corpse	NA	225	16S V4	Metabarcoding Illumina Miseq	N	NA	NA	NA	NA	NA	N	Shannon, Observed ASVs	https://doi.org/10.1111/ele.13240
68	Knowles et al.,	2020	Species identity dominates over environment in shaping the microbiota of small mammals	10	Rodentia	Microtus agrestis	LC	Europe	Lithuania	wild	corpse	NA	225	16S V4	Metabarcoding Illumina Miseq	N	NA	NA	NA	NA	NA	N	Shannon, Observed ASVs	https://doi.org/10.1111/ele.13240
68	Knowles et al.,	2020	Species identity dominates over environment in shaping the microbiota of small mammals	10	Rodentia	Microtus oeconomus	LC	Europe	Lithuania	wild	corpse	NA	225	16S V4	Metabarcoding Illumina Miseq	N	NA	NA	NA	NA	NA	N	Shannon, Observed ASVs	https://doi.org/10.1111/ele.13240
68	Knowles et al.,	2020	Species identity dominates over environment in shaping the microbiota of small mammals	10	Rodentia	Myodes glareolus	LC	Europe	Lithuania	wild	corpse	NA	225	16S V4	Metabarcoding Illumina Miseq	N	NA	NA	NA	NA	NA	N	Shannon, Observed ASVs	https://doi.org/10.1111/ele.13240
68	Knowles et al.,	2020	Species identity dominates over environment in shaping the microbiota of small mammals	10	Rodentia	Neomys fodiens	LC	Europe	Lithuania	wild	corpse	NA	225	16S V4	Metabarcoding Illumina Miseq	N	NA	NA	NA	NA	NA	N	Shannon, Observed ASVs	https://doi.org/10.1111/ele.13240
68	Knowles et al.,	2020	Species identity dominates over environment in shaping the microbiota of small mammals	10	Rodentia	Sorex araneus	LC	Europe	Lithuania	wild	corpse	NA	225	16S V4	Metabarcoding Illumina Miseq	N	NA	NA	NA	NA	NA	N	Shannon, Observed ASVs	https://doi.org/10.1111/ele.13240
68	Knowles et al.,	2020	Species identity dominates over environment in shaping the microbiota of small mammals	10	Rodentia	Sorex minutus	LC	Europe	Lithuania	wild	corpse	NA	225	16S V4	Metabarcoding Illumina Miseq	N	NA	NA	NA	NA	NA	N	Shannon, Observed ASVs	https://doi.org/10.1111/ele.13240
69	Grassotti et al.,	2021	Fecal bacterial communities of wild black capuchin monkeys (Sapajus nigritus) from the Atlantic Forest biome in Southern Brazil are divergent from those of other non-human primates	1	Primate	Sapajus nigritus	NT	South america	Brazil	wild	rectal swab	NA	10	16S V4	ion torrent multiplexed PGM	Y	qualitative	habitat types	NA	Explicit	Y	N	Chao1, Simpson, inversed simpson	https://doi.org/10.1016/j.crmicr.2021.100048
70	Wu et al.,	2021	Gut microbiota of homologous Chinese soft-shell turtles (Pelodiscus sinensis) in different habitats	1	Testudines	Pelodiscus sinensis	VU	Asia	China	captive	corpse	NA	24	16S V4-V5	Metabarcoding illumina Miseq	Y	qualitative	Habitat types	NA	Explicit	Y	N	Shannon, Chao1, evenness	https://doi.org/10.1186/s12866-021-02209-y
71	Berlow et al.,	2021	Effects of Urbanization and Landscape on Gut Microbiomes in White-Crowned Sparrows	1	Passeriformes	Zonotrichia leucophrys	LC	North America	EEUU	wild	rectal swab	NA	10	16S V4	Metabarcoding illumina Miseq	Y	qualitative/quantitative	Habitat types	Tree and Impervious Cover	Explicit	Y	Y	Shannon	https://doi.org/10.1007/s00248-020-01569-8
72	Adams et al.,	2021	Effect of Geography and Captivity on Scat Bacterial Communities in the Imperiled Channel Island Fox	1	Carnivora	Urocyon littoralis	NT	North America	EEUU	wild/captive	stools	fresh	95	16S V4	Metabarcoding illumina Miseq	Y	qualitative	wild/captive	NA	Explicit	Y	Y	Chao1, Shannon	https://doi.org/10.3389/fmicb.2021.748323
73	Stothart et al.,	2021	Shades of grey: host phenotype dependent effect of urbanization on the bacterial microbiome of a wild mammal	1	Rodentia	Sciurus carolinensis	LC	North America	Canada	wild	stools	fresh	195	16S V4	Metabarcoding illumina Miseq	Y	qualitative	Habitat types	NA	Explicit	Y	Y	Observed OTUs, Shannon	https://doi.org/10.1186/s42523-021-00105-4
74	Stothart et al.,	2020	Bacterial dispersal and drift drive microbiome diversity patterns within a population of feral hindgut fermenters	1	Perissodactyla	Equus ferus caballus	EN	North America	Canada	wild	stools	fresh	86	16S V3-V4	Metabarcoding illumina Miseq	Y	qualitative/quantitative	habitat types	Area of habitat classes ( (grassland, heathland, beach Pea, sandwort, structure, water)	Not explicit	N	N	Observed ASVs	https://doi.org/10.1111/mec.15747
75	Pekarsky et al.,	2021	Drivers of change and stability in the gut microbiota of an omnivorous avian migrant exposed to artificial food supplementation	1	Gruiformes	Grus grus	LC	Europe	Russia-Israel	wild	stools	NA	167	16S V4	Metabarcoding illumina Miseq	Y	qualitative	Habitat types	NA	Explicit	Y	Y	Shannon, Chao1, PD	https://doi.org/10.1111/mec.16079
76	McManus et al.,	2021	The gut microbiome as an indicator of habitat disturbance in a Critically Endangered lemur	1	Primate	Varecia variegata editorum	CR	Africa	Madagascar	wild	stools	fresh	67	16S V4-V5	Metabarcoding illumina Miseq	Y	qualitative	Habitat types	NA	Explicit	Y	Y	Shannon, PD, richness	https://doi.org/10.1186/s12862-021-01945-z
77	Li et al.,	2021	Diet-induced microbiome shifts of sympatric overwintering birds	2	Gruiformes	Otis tarda	VU	Asia	China	wild	stools	fresh	48	16S V3-V4	Metabarcoding illumina Miseq	N	NA	NA	NA	NA	NA	Y	Shannon, Chao1, inversed Simpson	https://doi.org/10.1007/s00253-021-11448-y
77	Li et al.,	2021	Diet-induced microbiome shifts of sympatric overwintering birds	2	Gruiformes	Grus grus	LC	Asia	China	wild	stools	fresh	48	16S V3-V4	Metabarcoding illumina Miseq	N	NA	NA	NA	NA	NA	Y	Shannon, Chao1, inversed Simpson	https://doi.org/10.1007/s00253-021-11448-y
78	Kuthyar et al.,	2020	Effects of anthropogenic habitat disturbance and Giardia duodenalis infection on a sentinel species' gut bacteria	1	Primate	Alouatta caraya	NT	South america	Argentina	wild	stools	fresh	61	16S V4	Metabarcoding illumina Miseq	Y	qualitative	Habitat types	NA	Explicit	Y	N	Shannon, PD, Observed ASVs	https://doi.org/10.1002/ece3.6910
79	Jiang et al.,	2021	Marked Seasonal Variation in Structure and Function of Gut Microbiota in Forest and Alpine Musk Deer	2	Artiodactyla	Mochus berezovskii	EN	Asia	China	captive	stools	fresh	352	16S V4-V5	Metabarcoding illumina Miseq	N	NA	NA	NA	NA	NA	Y	Shannon, sobs index	https://doi.org/10.3389/fmicb.2021.699797
79	Jiang et al.,	2021	Marked Seasonal Variation in Structure and Function of Gut Microbiota in Forest and Alpine Musk Deer	2	Artiodactyla	Moschus chrysogaster	EN	Asia	China	captive	stools	fresh	352	16S V4-V5	Metabarcoding illumina Miseq	N	NA	NA	NA	NA	NA	Y	Shannon, sobs index	https://doi.org/10.3389/fmicb.2021.699797
80	Greene et al.,	2021	Gut microbiota of frugo-folivorous sifakas across environments	1	Primate	Propithecus coquereli	CR	Africa	Madagascar	wild	stools	fresh	46	16S V4	Metabarcoding illumina Miseq	Y	qualitative	Wild/captive	NA	Explicit	Y	Y	Shannon, Observed ASVs, PD	https://doi.org/10.1186/s42523-021-00093-5
81	Fackelmann et al.,	2021	Human encroachment into wildlife gut microbiomes	1	Rodentia	Proechimys semispinosus	LC	Central america	Panama	wild	stools	fresh	384	16S V4	Metabarcoding illumina Miseq	Y	qualitative	Habitat types	NA	Explicit	Y	Y	Shannon, PD, Observed ASVs	https://doi.org/10.1038/s42003-021-02315-7
82	Eisenhofer et al.,	2021	Signatures of landscape and captivity in the gut microbiota of Southern Hairy-nosed Wombats (Lasiorhinus latifrons)	1	Diprotodontia	Lasiorhinus latifrons	NT	Oceania	Australia	wild/captive	stools	fresh	97	16S V4	Metabarcoding illumina Miseq	Y	qualitative	Habitat types	NA	Explicit	Y	Y	Observed OTUs, PD	https://doi.org/10.1186/s42523-020-00068-y
83	Couch et al.,	2021	Effects of supplemental feeding on the fecal bacterial communities of Rocky Mountain elk in the Greater Yellowstone Ecosystem	1	Artiodactyla	Cervus canadensis nelsoni	LC	North America	EEUU	wild	stools	fresh	282	16S V4	Metabarcoding illumina Miseq	N	NA	NA	NA	NA	NA	N	Shannon, Simpson Inversed, Observed ASVs	https://doi.org/10.1371/journal.pone.0249521
84	Stephens et al.,	2021	Analysis of bacterial communities associated with mountain chickadees (Poecile gambeli) across urban and rural habitats	1	Passeriformes	Poecile gambeli	LC	North America	Canada	wild	other	NA	18	16S V4	Ion torrent Chef system	Y	qualitative	Habitat types	NA	Explicit	Y	N	Shannon	https://doi.org/10.1139/cjm-2020-0320
85	Costantini et al.,	2021	Wild gut microbiomes reveal individuals, species, and location as drivers of variation in two critically endangered Hawaiian honeycreepers	2	Passeriformes	Oreomystis bairdi	CR	North America	Hawaii	wild	stools	fresh	55	16S V4	Metabarcoding illumina Miseq	N	NA	NA	NA	NA	NA	N	Shannon	https://doi.org/10.7717/peerj.12291
85	Costantini et al.,	2021	Wild gut microbiomes reveal individuals, species, and location as drivers of variation in two critically endangered Hawaiian honeycreepers	2	Passeriformes	Loxops caeruleirostris	CR	North America	Hawaii	wild	stools	fresh	55	16S V4	Metabarcoding illumina Miseq	N	NA	NA	NA	NA	NA	N	Shannon	https://doi.org/10.7717/peerj.12291
86	Barelli et al.,	2021	Interactions between parasitic helminths and gut microbiota in wild tropical primates from intact and fragmented habitats	2	Primate	Procolobus gordonorum	VU	Africa	Tanzania	wild	stools	fresh	158	16S V1-V3	Metabarcoding illumina Miseq	Y	qualitative	Habitat types	NA	Explicit	Y	N	Shannon, Chao1	https://doi.org/10.1038/s41598-021-01145-1
86	Barelli et al.,	2021	Interactions between parasitic helminths and gut microbiota in wild tropical primates from intact and fragmented habitats	2	Primate	Papio cynocephalus	LC	Africa	Tanzania	wild	stools	fresh	158	16S V1-V3	Metabarcoding illumina Miseq	Y	qualitative	Habitat types	NA	Explicit	Y	N	Shannon, Chao1	https://doi.org/10.1038/s41598-021-01145-1
87	Viquez-R et al.,	2021	A Faithful Gut: Core Features of Gastrointestinal Microbiota of Long-Distance Migratory Bats Remain Stable despite Dietary Shifts Driving Differences in Specific Bacterial Taxa	1	Chiroptera	Leptonycteris yerbabuenae	NT	North America	Mexico	wild	stools	fresh	520	16S V4	Metabarcoding illumina Miseq	N	NA	NA	NA	NA	NA	N	Observed ASVs, PD, Shannon	https://doi.org/10.1128/Spectrum.01525-21
88	Zhang et al.,	2020	Comparison of the gut microbiota in the Tibetan wild ass (Equus kiang) collected from high and low altitude	1	Perissodactyla	Equus kiang	LC	Asia	China	wild/captive	stools	fresh	81	16S V3-V4	Metabarcoding illumina Hiseq	N	NA	NA	NA	NA	NA	Y	Shannon,Chao1, ACE	https://doi.org/10.17582/journal.pjz/20180522070505
89	Lutz et al.,	2019	Ecology and host identity outweigh evolutionary history in shaping the bat microbiome	31	Chiroptera	Myonycteris angolensis	LC	Africa	Kenya; Uganda	wild	stools	fresh	497	16S V4	Metabarcoding illumina Hiseq	N	NA	NA	NA	NA	NA	N	Shannon, Observed ASVs	https://doi.org/10.1128/mSystems.00511-19
89	Lutz et al.,	2021	Ecology and host identity outweigh evolutionary history in shaping the bat microbiome	31	Chiroptera	Stenonycteris lanosus	LC	Africa	Kenya; Uganda	wild	stools	fresh	497	16S V4	Metabarcoding illumina Hiseq	N	NA	NA	NA	NA	NA	N	Shannon, Observed ASVs	https://doi.org/10.1128/mSystems.00511-19
89	Lutz et al.,	2021	Ecology and host identity outweigh evolutionary history in shaping the bat microbiome	31	Chiroptera	Epomophorus wahlbergi	LC	Africa	Kenya; Uganda	wild	stools	fresh	497	16S V4	Metabarcoding illumina Hiseq	N	NA	NA	NA	NA	NA	N	Shannon, Observed ASVs	https://doi.org/10.1128/mSystems.00511-19
89	Lutz et al.,	2021	Ecology and host identity outweigh evolutionary history in shaping the bat microbiome	31	Chiroptera	Nycteris arge	LC	Africa	Kenya; Uganda	wild	stools	fresh	497	16S V4	Metabarcoding illumina Hiseq	N	NA	NA	NA	NA	NA	N	Shannon, Observed ASVs	https://doi.org/10.1128/mSystems.00511-19
89	Lutz et al.,	2021	Ecology and host identity outweigh evolutionary history in shaping the bat microbiome	31	Chiroptera	Rhinolophus clivosus acrotis	LC	Africa	Kenya; Uganda	wild	stools	fresh	497	16S V4	Metabarcoding illumina Hiseq	N	NA	NA	NA	NA	NA	N	Shannon, Observed ASVs	https://doi.org/10.1128/mSystems.00511-19
89	Lutz et al.,	2021	Ecology and host identity outweigh evolutionary history in shaping the bat microbiome	31	Chiroptera	Scotoecus hindei	LC	Africa	Kenya; Uganda	wild	stools	fresh	497	16S V4	Metabarcoding illumina Hiseq	N	NA	NA	NA	NA	NA	N	Shannon, Observed ASVs	https://doi.org/10.1128/mSystems.00511-19
89	Lutz et al.,	2021	Ecology and host identity outweigh evolutionary history in shaping the bat microbiome	31	Chiroptera	Pipistrellus sp.	NA	Africa	Kenya; Uganda	wild	stools	fresh	497	16S V4	Metabarcoding illumina Hiseq	N	NA	NA	NA	NA	NA	N	Shannon, Observed ASVs	https://doi.org/10.1128/mSystems.00511-19
89	Lutz et al.,	2021	Ecology and host identity outweigh evolutionary history in shaping the bat microbiome	31	Chiroptera	Micropteropus pusillus	LC	Africa	Kenya; Uganda	wild	stools	fresh	497	16S V4	Metabarcoding illumina Hiseq	N	NA	NA	NA	NA	NA	N	Shannon, Observed ASVs	https://doi.org/10.1128/mSystems.00511-19
89	Lutz et al.,	2021	Ecology and host identity outweigh evolutionary history in shaping the bat microbiome	31	Chiroptera	Epomophorus labiatus	LC	Africa	Kenya; Uganda	wild	stools	fresh	497	16S V4	Metabarcoding illumina Hiseq	N	NA	NA	NA	NA	NA	N	Shannon, Observed ASVs	https://doi.org/10.1128/mSystems.00511-19
89	Lutz et al.,	2021	Ecology and host identity outweigh evolutionary history in shaping the bat microbiome	31	Chiroptera	Chaerephon bivittatus	LC	Africa	Kenya; Uganda	wild	stools	fresh	497	16S V4	Metabarcoding illumina Hiseq	N	NA	NA	NA	NA	NA	N	Shannon, Observed ASVs	https://doi.org/10.1128/mSystems.00511-19
89	Lutz et al.,	2021	Ecology and host identity outweigh evolutionary history in shaping the bat microbiome	31	Chiroptera	Rousettus aegyptiacus	LC	Africa	Kenya; Uganda	wild	stools	fresh	497	16S V4	Metabarcoding illumina Hiseq	N	NA	NA	NA	NA	NA	N	Shannon, Observed ASVs	https://doi.org/10.1128/mSystems.00511-19
89	Lutz et al.,	2021	Ecology and host identity outweigh evolutionary history in shaping the bat microbiome	31	Chiroptera	Doryrhina camerunensis	DD	Africa	Kenya; Uganda	wild	stools	fresh	497	16S V4	Metabarcoding illumina Hiseq	N	NA	NA	NA	NA	NA	N	Shannon, Observed ASVs	https://doi.org/10.1128/mSystems.00511-19
89	Lutz et al.,	2021	Ecology and host identity outweigh evolutionary history in shaping the bat microbiome	31	Chiroptera	Scotophilus dinganii	LC	Africa	Kenya; Uganda	wild	stools	fresh	497	16S V4	Metabarcoding illumina Hiseq	N	NA	NA	NA	NA	NA	N	Shannon, Observed ASVs	https://doi.org/10.1128/mSystems.00511-19
89	Lutz et al.,	2021	Ecology and host identity outweigh evolutionary history in shaping the bat microbiome	31	Chiroptera	Neoromicia nana	LC	Africa	Kenya; Uganda	wild	stools	fresh	497	16S V4	Metabarcoding illumina Hiseq	N	NA	NA	NA	NA	NA	N	Shannon, Observed ASVs	https://doi.org/10.1128/mSystems.00511-19
89	Lutz et al.,	2021	Ecology and host identity outweigh evolutionary history in shaping the bat microbiome	31	Chiroptera	Miniopterus inflatus rufus	LC	Africa	Kenya; Uganda	wild	stools	fresh	497	16S V4	Metabarcoding illumina Hiseq	N	NA	NA	NA	NA	NA	N	Shannon, Observed ASVs	https://doi.org/10.1128/mSystems.00511-19
89	Lutz et al.,	2021	Ecology and host identity outweigh evolutionary history in shaping the bat microbiome	31	Chiroptera	Hipposideros ruber	LC	Africa	Kenya; Uganda	wild	stools	fresh	497	16S V4	Metabarcoding illumina Hiseq	N	NA	NA	NA	NA	NA	N	Shannon, Observed ASVs	https://doi.org/10.1128/mSystems.00511-19
89	Lutz et al.,	2021	Ecology and host identity outweigh evolutionary history in shaping the bat microbiome	31	Chiroptera	Hipposideros caffer	LC	Africa	Kenya; Uganda	wild	stools	fresh	497	16S V4	Metabarcoding illumina Hiseq	N	NA	NA	NA	NA	NA	N	Shannon, Observed ASVs	https://doi.org/10.1128/mSystems.00511-19
89	Lutz et al.,	2021	Ecology and host identity outweigh evolutionary history in shaping the bat microbiome	31	Chiroptera	Rhinolophus hildebrandtii	LC	Africa	Kenya; Uganda	wild	stools	fresh	497	16S V4	Metabarcoding illumina Hiseq	N	NA	NA	NA	NA	NA	N	Shannon, Observed ASVs	https://doi.org/10.1128/mSystems.00511-19
89	Lutz et al.,	2021	Ecology and host identity outweigh evolutionary history in shaping the bat microbiome	31	Chiroptera	Miniopterus natalensis	LC	Africa	Kenya; Uganda	wild	stools	fresh	497	16S V4	Metabarcoding illumina Hiseq	N	NA	NA	NA	NA	NA	N	Shannon, Observed ASVs	https://doi.org/10.1128/mSystems.00511-19
89	Lutz et al.,	2021	Ecology and host identity outweigh evolutionary history in shaping the bat microbiome	31	Chiroptera	Myotis tricolor	LC	Africa	Kenya; Uganda	wild	stools	fresh	497	16S V4	Metabarcoding illumina Hiseq	N	NA	NA	NA	NA	NA	N	Shannon, Observed ASVs	https://doi.org/10.1128/mSystems.00511-19
89	Lutz et al.,	2021	Ecology and host identity outweigh evolutionary history in shaping the bat microbiome	31	Chiroptera	Coleura afra	LC	Africa	Kenya; Uganda	wild	stools	fresh	497	16S V4	Metabarcoding illumina Hiseq	N	NA	NA	NA	NA	NA	N	Shannon, Observed ASVs	https://doi.org/10.1128/mSystems.00511-19
89	Lutz et al.,	2021	Ecology and host identity outweigh evolutionary history in shaping the bat microbiome	31	Chiroptera	Miniopterus africanus	DD	Africa	Kenya; Uganda	wild	stools	fresh	497	16S V4	Metabarcoding illumina Hiseq	N	NA	NA	NA	NA	NA	N	Shannon, Observed ASVs	https://doi.org/10.1128/mSystems.00511-19
89	Lutz et al.,	2021	Ecology and host identity outweigh evolutionary history in shaping the bat microbiome	31	Chiroptera	Miniopterus minor	DD	Africa	Kenya; Uganda	wild	stools	fresh	497	16S V4	Metabarcoding illumina Hiseq	N	NA	NA	NA	NA	NA	N	Shannon, Observed ASVs	https://doi.org/10.1128/mSystems.00511-19
89	Lutz et al.,	2021	Ecology and host identity outweigh evolutionary history in shaping the bat microbiome	31	Chiroptera	Neoromicia sp.	NA	Africa	Kenya; Uganda	wild	stools	fresh	497	16S V4	Metabarcoding illumina Hiseq	N	NA	NA	NA	NA	NA	N	Shannon, Observed ASVs	https://doi.org/10.1128/mSystems.00511-19
89	Lutz et al.,	2021	Ecology and host identity outweigh evolutionary history in shaping the bat microbiome	31	Chiroptera	Macronycteris vittatus	NT	Africa	Kenya; Uganda	wild	stools	fresh	497	16S V4	Metabarcoding illumina Hiseq	N	NA	NA	NA	NA	NA	N	Shannon, Observed ASVs	https://doi.org/10.1128/mSystems.00511-19
89	Lutz et al.,	2021	Ecology and host identity outweigh evolutionary history in shaping the bat microbiome	31	Chiroptera	Triaenops afer	LC	Africa	Kenya; Uganda	wild	stools	fresh	497	16S V4	Metabarcoding illumina Hiseq	N	NA	NA	NA	NA	NA	N	Shannon, Observed ASVs	https://doi.org/10.1128/mSystems.00511-19
89	Lutz et al.,	2021	Ecology and host identity outweigh evolutionary history in shaping the bat microbiome	31	Chiroptera	Otomops harrisoni	VU	Africa	Kenya; Uganda	wild	stools	fresh	497	16S V4	Metabarcoding illumina Hiseq	N	NA	NA	NA	NA	NA	N	Shannon, Observed ASVs	https://doi.org/10.1128/mSystems.00511-19
89	Lutz et al.,	2021	Ecology and host identity outweigh evolutionary history in shaping the bat microbiome	31	Chiroptera	Rhinolophus clivosus	LC	Africa	Kenya; Uganda	wild	stools	fresh	497	16S V4	Metabarcoding illumina Hiseq	N	NA	NA	NA	NA	NA	N	Shannon, Observed ASVs	https://doi.org/10.1128/mSystems.00511-19
89	Lutz et al.,	2021	Ecology and host identity outweigh evolutionary history in shaping the bat microbiome	31	Chiroptera	Rhinolophus eloquens	LC	Africa	Kenya; Uganda	wild	stools	fresh	497	16S V4	Metabarcoding illumina Hiseq	N	NA	NA	NA	NA	NA	N	Shannon, Observed ASVs	https://doi.org/10.1128/mSystems.00511-19
89	Lutz et al.,	2021	Ecology and host identity outweigh evolutionary history in shaping the bat microbiome	31	Chiroptera	Rhinolophus landeri	LC	Africa	Kenya; Uganda	wild	stools	fresh	497	16S V4	Metabarcoding illumina Hiseq	N	NA	NA	NA	NA	NA	N	Shannon, Observed ASVs	https://doi.org/10.1128/mSystems.00511-19
89	Lutz et al.,	2021	Ecology and host identity outweigh evolutionary history in shaping the bat microbiome	31	Chiroptera	Nycteris thebaica	LC	Africa	Kenya; Uganda	wild	stools	fresh	497	16S V4	Metabarcoding illumina Hiseq	N	NA	NA	NA	NA	NA	N	Shannon, Observed ASVs	https://doi.org/10.1128/mSystems.00511-19
90	Michel et al.,	2022	Isolated Grauer's gorilla populations differ in diet and gut microbiome	1	Primate	Gorilla beringei graueri	CR	Africa	Congo	wild	stools	fresh	70	16S V4	Metabarcoding illumina Miseq	Y	qualitative	habitat types	NA	Explicit	Y	Y	Observed ASVs, evenness	https://doi.org/10.1111/mec.16663
91	Lavrinienko et al.,	2021	Comparable response of wild rodent gut microbiome to anthropogenic habitat contamination	4	Rodentia	Apodemus flavicollis	LC	Europe-Asia	Ukraine-Japan	wild	corpse	NA	228	16S V4	Metabarcoding illumina Miseq	Y	qualitative	contamination	NA	Explicit	Y	N	Shannon, PD, Observed ASVs	https://doi.org/10.1111/mec.15945
91	Lavrinienko et al.,	2021	Comparable response of wild rodent gut microbiome to anthropogenic habitat contamination	4	Rodentia	Apodemus sylvaticus	LC	Europe-Asia	Ukraine-Japan	wild	corpse	NA	228	16S V4	Metabarcoding illumina Miseq	Y	qualitative	contamination	NA	Explicit	Y	N	Shannon, PD, Observed ASVs	https://doi.org/10.1111/mec.15945
91	Lavrinienko et al.,	2021	Comparable response of wild rodent gut microbiome to anthropogenic habitat contamination	4	Rodentia	Apodemus speciosus	LC	Europe-Asia	Ukraine-Japan	wild	corpse	NA	228	16S V4	Metabarcoding illumina Miseq	Y	qualitative	contamination	NA	Explicit	Y	N	Shannon, PD, Observed ASVs	https://doi.org/10.1111/mec.15945
91	Lavrinienko et al.,	2021	Comparable response of wild rodent gut microbiome to anthropogenic habitat contamination	4	Rodentia	Apodemus argenteus	LC	Europe-Asia	Ukraine-Japan	wild	corpse	NA	228	16S V4	Metabarcoding illumina Miseq	Y	qualitative	contamination	NA	Explicit	Y	N	Shannon, PD, Observed ASVs	https://doi.org/10.1111/mec.15945
92	Chen et al.,	2021	Habitat environmental factors influence intestinal microbial diversity of the short-faced moles (Scaptochirus moschata)	1	Eulipotyphla	Scaptochirus moschata	LC	Asia	China	wild	corpse	NA	22	16S V3-V4	Metabarcoding illumina Hiseq	N	NA	NA	NA	NA	NA	N	Shannon, Chao1, Simpson, ACE, Observed OTUs	https://doi.org/10.1186/s13568-021-01252-2
93	Eliades et al.,	2022	Gut microbial ecology of Philippine gekkonids: ecoevolutionary effects on microbiome compositions	9	Squamata	Cyrtodactylus philippinicus	LC	Asia	Philippines	wild	rectal swab	NA	47	16S V4	Metabarcoding illumina Miseq	Y	qualitative	Habitat types	NA	Explicit	Y	N	Shannon, PD, Observed OTUs	https://doi.org/10.1093/femsec/fiac124
93	Eliades et al.,	2022	Gut microbial ecology of Philippine gekkonids: ecoevolutionary effects on microbiome compositions	9	Squamata	Gekko crombota	LC	Asia	Philippines	wild	rectal swab	NA	47	16S V4	Metabarcoding illumina Miseq	N	qualitative	Habitat types	NA	Explicit	Y	N	Shannon, PD, Observed OTUs	https://doi.org/10.1093/femsec/fiac124
93	Eliades et al.,	2022	Gut microbial ecology of Philippine gekkonids: ecoevolutionary effects on microbiome compositions	9	Squamata	Gekko gecko	LC	Asia	Philippines	wild	rectal swab	NA	47	16S V4	Metabarcoding illumina Miseq	N	qualitative	Habitat types	NA	Explicit	Y	N	Shannon, PD, Observed OTUs	https://doi.org/10.1093/femsec/fiac124
93	Eliades et al.,	2022	Gut microbial ecology of Philippine gekkonids: ecoevolutionary effects on microbiome compositions	9	Squamata	Gekko kikuchii	LC	Asia	Philippines	wild	rectal swab	NA	47	16S V4	Metabarcoding illumina Miseq	N	qualitative	Habitat types	NA	Explicit	Y	N	Shannon, PD, Observed OTUs	https://doi.org/10.1093/femsec/fiac124
93	Eliades et al.,	2022	Gut microbial ecology of Philippine gekkonids: ecoevolutionary effects on microbiome compositions	9	Squamata	Gekko mindorensi	LC	Asia	Philippines	wild	rectal swab	NA	47	16S V4	Metabarcoding illumina Miseq	N	qualitative	Habitat types	NA	Explicit	Y	N	Shannon, PD, Observed OTUs	https://doi.org/10.1093/femsec/fiac124
93	Eliades et al.,	2022	Gut microbial ecology of Philippine gekkonids: ecoevolutionary effects on microbiome compositions	9	Squamata	Gekko rossi	LC	Asia	Philippines	wild	rectal swab	NA	47	16S V4	Metabarcoding illumina Miseq	N	qualitative	Habitat types	NA	Explicit	Y	N	Shannon, PD, Observed OTUs	https://doi.org/10.1093/femsec/fiac124
93	Eliades et al.,	2022	Gut microbial ecology of Philippine gekkonids: ecoevolutionary effects on microbiome compositions	9	Squamata	Hemidactylus frenatus	LC	Asia	Philippines	wild	rectal swab	NA	47	16S V4	Metabarcoding illumina Miseq	N	qualitative	Habitat types	NA	Explicit	Y	N	Shannon, PD, Observed OTUs	https://doi.org/10.1093/femsec/fiac124
93	Eliades et al.,	2022	Gut microbial ecology of Philippine gekkonids: ecoevolutionary effects on microbiome compositions	9	Squamata	Hemidactylus platyurus	LC	Asia	Philippines	wild	rectal swab	NA	47	16S V4	Metabarcoding illumina Miseq	N	qualitative	Habitat types	NA	Explicit	Y	N	Shannon, PD, Observed OTUs	https://doi.org/10.1093/femsec/fiac124
93	Eliades et al.,	2022	Gut microbial ecology of Philippine gekkonids: ecoevolutionary effects on microbiome compositions	9	Squamata	Luperosaurus macgregori	NT	Asia	Philippines	wild	rectal swab	NA	47	16S V4	Metabarcoding illumina Miseq	N	qualitative	Habitat types	NA	Explicit	Y	N	Shannon, PD, Observed OTUs	https://doi.org/10.1093/femsec/fiac124
94	Bunker et al.,	2022	Cloacal microbiomes of sympatric and allopatric Sceloporus lizards vary with environment and host relatedness	3	Squamata	Sceloporus virgatus	LC	North America	EEUU	wild	rectal swab	NA	225	16S V4	Metabarcoding Illumina Miseq	Y	qualitative	Habitat types	NA	Explicit	Y	Y	Shannon, PD, Observed ASVs	https://doi.org/10.1371/journal.pone.0279288
94	Bunker et al.,	2022	Cloacal microbiomes of sympatric and allopatric Sceloporus lizards vary with environment and host relatedness	3	Squamata	Sceloporus jarrovii	LC	North America	EEUU	wild	rectal swab	NA	225	16S V4	Metabarcoding Illumina Miseq	Y	qualitative	Habitat types	NA	Explicit	Y		Shannon, PD, Observed ASVs	https://doi.org/10.1371/journal.pone.0279288
94	Bunker et al.,	2022	Cloacal microbiomes of sympatric and allopatric Sceloporus lizards vary with environment and host relatedness	3	Squamata	Sceloporus occidentalis	LC	North America	EEUU	wild	rectal swab	NA	225	16S V4	Metabarcoding Illumina Miseq	Y	qualitative	Habitat types	NA	Explicit	Y		Shannon, PD, Observed ASVs	https://doi.org/10.1371/journal.pone.0279288
95	Fuirst et al.,	2018	Effects of urbanization on the foraging ecology and microbiota of the generalist seabird Larus argentatus	1	Charadriiformes	Larus argentatus	LC	North America	EEUU	wild	rectal swab	NA	23	16S V3-V4	Metabarcoding Illumina Miseq	Y	qualitative	Habitat types	NA	Explicit	Y	N	Shannon, PD, Pielou	https://doi.org/10.1371/journal.pone.0209200
96	Yuan et al.,	2022	Effects of vegetation type differences induced by human disturbance on the nutrition strategy and gut microbiota of Siberian roe deer	1	Artiodactyla	Capreolus pygargus	LC	Asia	China	wild	stools	fresh	98	16S V3-V4	Metabarcoding Illumina Hiseq	Y	qualitative/quantitative	Habitat types	Vegetation type area; distance of each investigation unit to villages, farmland, and roads	Explicit	Y	Y	Shannon, Simpson, Observed OTUs	https://doi.org/10.1111/mec.16775
97	Xu et al.,	2022	Linking the bacterial microbiome between gut and habitat soil of Tibetan macaque (Macaca thibetana)	1	Primate	Macaca thibetana	NT	Asia	China	wild	stools	fresh	73	16S V3-V4	Metabarcoding Illumina Miseq	N	NA	NA	NA	NA	NA	N	Shannon, Observed ASVs	https://doi.org/10.1002/ece3.9227
98	Trujillo et al.,	2022	Intrinsic and extrinsic factors influence on an omnivore‚Äôs gut microbiome	1	Carnivora	Ursus arctos	LC	North America	EEUU	wild	stools	fresh	66	16S V4	Metabarcoding Illumina Miseq	Y	qualitative	Habitat types	NA	Not explicit	N	Y	Shannon, Simpson, PD	https://doi.org/10.1371/journal.pone.0266698
99	Shi et al.,	2022	Comparative Analysis of the Gut Microbiota of Mongolian Gazelle (Procapra gutturosa) Under Fragmented Habitats	1	Artiodactyla	Procapra gutturosa	LC	Asia	China	wild	stools	fresh	9	Metagenome	Illumina Hiseq	N	NA	NA	NA	NA	NA	N	NA	https://doi.org/10.3389/fmicb.2022.830321
100	Rudolph et al.,	2022	Drivers of gut microbiome variation within and between groups of a wild Malagasy primate	1	Primate	Propithecus verreauxi	CR	Africa	Madagascar	wild	stools	fresh	519	16S	Metabarcoding Illumina Miseq	N	NA	NA	NA	NA	NA	N	PD	https://doi.org/10.1186/s40168-021-01223-6
101	Mason et al.,	2022	Gastrointestinal symbiont diversity in wild gorilla: A comparison of bacterial and strongylid communities across multiple localities	1	Primate	Gorilla spp	CR	Africa	Congo	wild	stools	fresh	215	16S V3-V4	Metabarcoding Illumina Miseq	Y	qualitative	Habitat types	NA	Explicit	Y	Y	Observed ASVs	https://doi.org/10.1111/mec.16558
102	Martinez-Mota et al.,	2022	Environmental Stress and the Primate Microbiome: Glucocorticoids Contribute to Structure Gut Bacterial Communities of Black Howler Monkeys in Anthropogenically Disturbed Forest Fragments	1	Primate	Alouatta pigra	EN	North America	Mexico	wild	stools	fresh	61	16S V4-V5	Metabarcoding Illumina Miseq	Y	quantitative	NA	Diversity of tree species	Explicit	Y	Y	Shannon, PD, Pielou	https://doi.org/10.3389/fevo.2022.863242
103	Maraci et al.,	2022	Changes to the gut microbiota of a wild juvenile passerine in a multidimensional urban mosaic	1	Passeriformes	Parus major	LC	Europe	Poland	wild	stools	fresh	82	16S V3-V4	Metabarcoding Illumina Miseq	Y	qualitative/quantitative	Habitat types	% ISA	Explicit	Y	Y	Shannon, PD, Observed OTUs	https://doi.org/10.1038/s41598-022-10734-7
104	Gurbanov et al.,	2022	Metagenomic analysis of intestinal microbiota in wild rats living in urban and rural habitats	1	Rodentia	Rattus rattus	LC	Asia	Turquia	wild	stools	fresh	6	16S V3-V4	Metabarcoding Illumina Miseq	Y	qualitative	Habitat types	NA	Explicit	Y	Y	Shannon, Simpson	https://doi.org/10.1007/s12223-022-00951-y
105	Goossens et al.,	2022	Tree Species Diversity and Forest Edge Density Jointly Shape the Gut Microbiota Composition in Juvenile Great Tits (Parus major)	1	Passeriformes	Parus major	LC	Europe	Belgium	wild	stools	fresh	49	16S V3-V4	Metabarcoding Illumina Miseq	Y	quantitative	NA	Fragment-level forest area; Plot-level edge density	Explicit	Y	Y	Shannon, Chao1	https://doi.org/10.3389/fmicb.2022.790189
106	Drobniak et al.,	2021	Habitat shapes diversity of gut microbiomes in a wild population of blue tits Cyanistes caeruleus	1	Passeriformes	Cyanistes caeruleus	LC	Europe	Suecia	wild	stools	fresh	175	16S V3-V4	Metabarcoding Illumina Miseq	Y	qualitative	Habitat types	NA	Not explicit	Y	Y	Shannon, Pielou, PD, Observed ASVs	https://doi.org/10.1111/jav.02829
107	Bornbusch et al.,	2022	Gut microbiota of ring-tailed lemurs (Lemur catta) vary across natural and captive populations and correlate with environmental microbiota	1	Primate	Lemu catta	EN	Africa	Madagascar, EEUU	wild/captive	stools	fresh	209	16S V4	Metabarcoding Illumina Miseq	Y	qualitative	wild/captive	NA	Explicit	Y	Y	Shannon, PD	https://doi.org/10.1186/s42523-022-00176-x
108	Wasimuddin et al.,	2022	Anthropogenic Disturbance Impacts Gut Microbiome Homeostasis in a Malagasy Primate	1	Primate	Microcebus griseorufus	LC	Africa	Madagascar	wild	stools	fresh	164	16S V4	Metabarcoding Illumina Miseq	Y	qualitative	Habitat types	NA	Explicit	Y	Y	Shannon, PD, Observed ASVs	https://doi.org/10.3389/fmicb.2022.911275
109	Schwensow et al.,	2022	Disentangling direct from indirect effects of habitat disturbance on multiple components of biodiversity	1	Rodentia	Proechimys semispinosus	LC	Central america	Panama	wild	stools	fresh	262	16S V4	Metabarcoding Illumina NextSeq 500 V2	Y	qualitative	Habitat types	NA	Explicit	N	N	NA	https://doi.org/10.1111/1365-2656.13802
110	Lafferty et al.,	2022	The gut microbiome of wild American marten in the Upper Peninsula of Michigan	1	Carnivora	Martes americana	LC	North America	EEUU	wild	corpse	NA	21	16S V4	Metabarcoding Illumina Miseq	Y	quantitative	NA	Human Footprint Score (HFS), Relative percentage of coniferous forest	Explicit	Y	N	Shannon, PD, Chao1	https://doi.org/10.1371/journal.pone.0275850
111	Gillman et al.,	2022	Human-provisioned foods reduce gut microbiome diversity in American black bears (Ursus americanus)	1	Carnivora	Ursus americanus	LC	North America	EEUU	wild	corpse	NA	35	16S V4	Metabarcoding	N	NA	NA	NA	NA	NA	NA	Observed ASVs, PD	https://doi.org/10.1093/jmammal/gyab154
112	Neha et al.,	2023	Fine-scale spatial variation shape fecal microbiome diversity and composition in black-tailed prairie dogs (Cynomys ludovicianus)	1	Rodentia	Cynomys ludovicianus	LC	North America	EEUU	wild	stools	fresh	70	16S V1-V3	Metabarcoding Illumina Miseq	Y	qualitative	Habitat types	NA	Explicit	Y	Y	Shannon, PD, Observed OTUs	https://doi.org/10.1186/s12866-023-02778-0
113	Lobato-Bailon et al.,	2023	The fecal bacterial microbiome of the Kuhl's pipistrelle bat (Pipistrellus kuhlii) reflects landscape anthropogenic pressure	1	Chiroptera	Pipistrellus kuhlii	LC	Europe	Spain	wild	stools	fresh	31	16S gene	Nanopore long-read sequencer MinION	Y	qualitative	Habitat types	NA	Explicit	Y	Y	Shannon	https://doi.org/10.1186/s42523-023-00229-9
114	Lan et al.,	2023	Gut microbiota of skywalker hoolock gibbons (Hoolock tianxing) from different habitats and in captivity: Implications for gibbon health	1	Primate	Hoolock tianxing	EN	Asia	China	wild/captive	stools	fresh	33	16S V3-V4	Metabarcoding Illumina Hiseq	Y	qualitative	wild/captive	NA	Explicit	Y	Y	Shannon, Chao1, Simpson, ACE	https://doi.org/10.1002/ajp.23468
115	Lai et al.,	2023	Gut microbiota of white-headed black langurs (Trachypithecus leucocephalus) in responses to habitat fragmentation	1	Primate	Trachypithecus leucocephalus	CR	Asia	China	wild	stools	fresh	203	16S V3-V4	Metabarcoding Illumina Miseq	N	NA	NA	NA	NA	NA	Y	Shannon, Simpson, Chao1, ACE	https://doi.org/10.3389/fmicb.2023.1126257
116	Nardi et al.,	2023	Analysis of Scat for Gut Microbiome Identification in Wolves from a Mediterranean and an Alpine Area	1	Carnivora	Canis lupus	LC	Europe	Italy	wild	stools	fresh	36	16S V3-V4	Metabarcoding Illumina Miseq	N	NA	NA	NA	NA	NA	Y	Shannon, Pielou, PD, Observed OTUs	https://doi.org/10.3390/d15010037
117	Heni et al.,	2023	Wildlife gut microbiomes of sympatric generalist species respond differently to anthropogenic landscape disturbances	3	Rodentia	Proechimys semispinosus	LC	Central america	Panama	wild	stools	fresh	569	16S V4	Metabarcoding Illumina Miseq	Y	qualitative	Habitat types	NA	Explicit	Y	Y	Shannon, PD, Observed ASVs	https://doi.org/10.1186/s42523-023-00237-9
117	Heni et al.,	2023	Wildlife gut microbiomes of sympatric generalist species respond differently to anthropogenic landscape disturbances	3	Didelphimorphia	Didelphis marsupialis	LC	Central america	Panama	wild	stools	fresh	569	16S V4	Metabarcoding Illumina Miseq	Y	qualitative	Habitat types	NA	Explicit	Y	Y	Shannon, PD, Observed ASVs	https://doi.org/10.1186/s42523-023-00237-9
117	Heni et al.,	2023	Wildlife gut microbiomes of sympatric generalist species respond differently to anthropogenic landscape disturbances	3	Didelphimorphia	Philander opossum	LC	Central america	Panama	wild	stools	fresh	569	16S V4	Metabarcoding Illumina Miseq	Y	qualitative	Habitat types	NA	Explicit	Y	Y	Shannon, PD, Observed ASVs	https://doi.org/10.1186/s42523-023-00237-9
118	McCord et al.,	2014	Fecal Microbiomes of Non-Human Primates in Western Uganda Reveal Species-Specific Communities Largely Resistant to Habitat Perturbation	3	Primate	Procolobus rufomitratus ascanius	LC	Africa	Uganda	wild	stools	fresh	353	16S y 23S	Sanger ABI 3730xl	Y	qualitative	Habitat types	NA	Explicit	Y	NA	NA	https://doi.org/10.1002/ajp.22238
118	McCord et al.,	2014	Fecal Microbiomes of Non-Human Primates in Western Uganda Reveal Species-Specific Communities Largely Resistant to Habitat Perturbation	3	Primate	Colobus guereza	LC	Africa	Uganda	wild	stools	fresh	353	16S y 23S	Sanger ABI 3730xl	Y	qualitative	Habitat types	NA	Explicit	Y	NA	NA	https://doi.org/10.1002/ajp.22238
118	McCord et al.,	2014	Fecal Microbiomes of Non-Human Primates in Western Uganda Reveal Species-Specific Communities Largely Resistant to Habitat Perturbation	3	Primate	Cercopithecus ascanius	LC	Africa	Uganda	wild	stools	fresh	353	16S y 23S	Sanger ABI 3730xl	Y	qualitative	Habitat types	NA	Explicit	Y	NA	NA	https://doi.org/10.1002/ajp.22238
119	Maurice et al.,	2015	Marked seasonal variation in the wild mouse gut microbiota	1	Rodentia	Apodemus sylvaticus	LC	Europe	United kingdom	wild	stools	fresh	481	16S V4	Metabarcoding Illumina HiSeq platform	N	NA	NA	NA	NA	NA	NA	NA	https://doi.org/10.1038/ismej.2015.53
